# Supplementary material for: Study of molar properties of GO after doping with transition metals for photodegradation of fluorescent dyes
Source: Royal Society of Chemistry journal article supplement (doi:10.1039/d2ra04230d), 2022-01-01
Supplement: d2ra04230d1.pdf [file d2ra04230d1.pdf]

## Study of molar properties of GO and doping with transition metals for photodegradation of fluorescent dyes

Krishan Kumar, Riddhi P. Dave, Sachin Dev, Man Singh\*

School of Chemical Sciences, Central University of Gujarat, Gandhinagar Sector-30, Gujarat,  
382030, (India)

Krishan8053649040@gmail.com, riddhidave15@outlook.com, sachin.dev708@gmail.com,

\*mansingh50@hotmail.com,

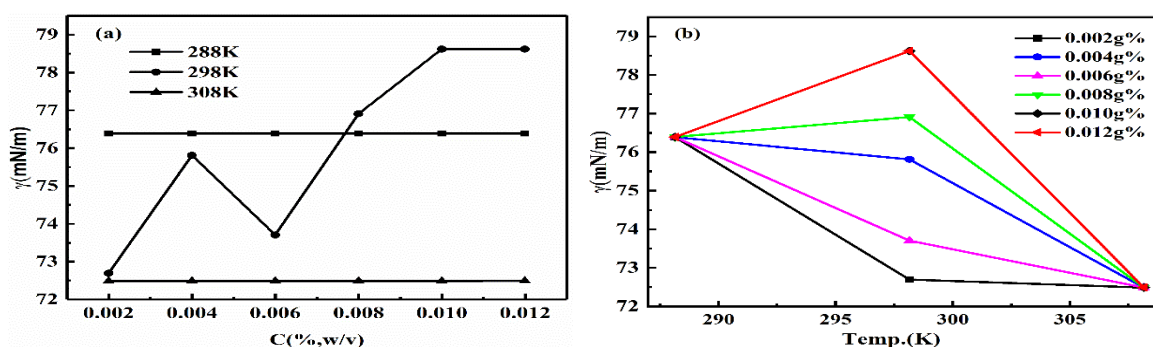

SI Figs. 1.0.  $\gamma$  vs (a) T/K, (b) conc. of aq-GO.

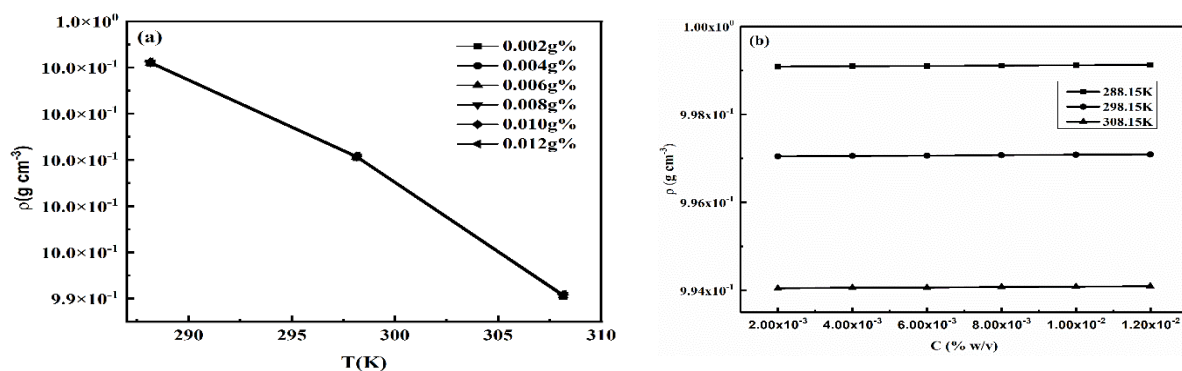

SI Figs.1.1  $\rho$  vs (a) T/K, (b) conc. of aq-GO.

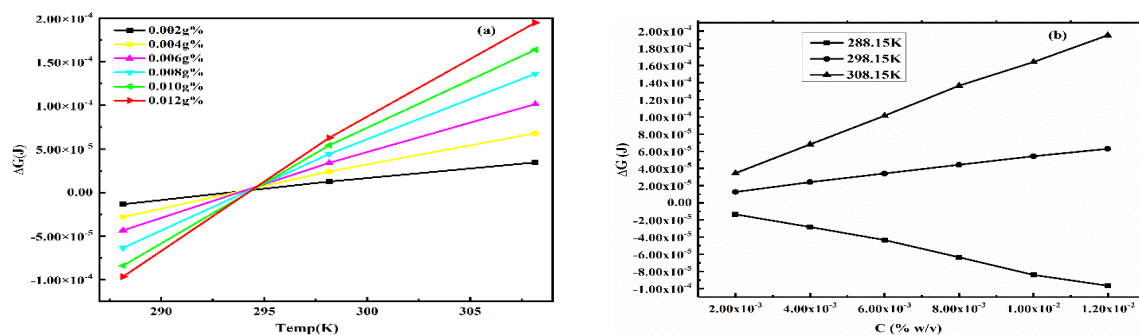

SI Figs.1.2  $\Delta G$  vs (a) T/K, (b) conc. of aq-GO.

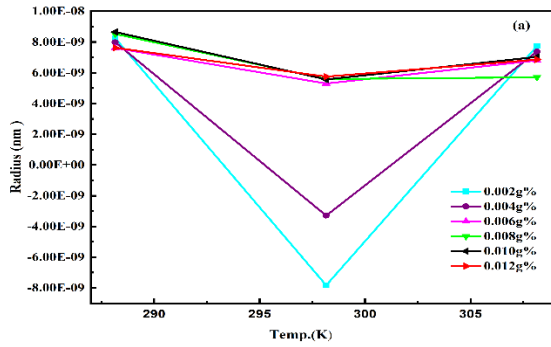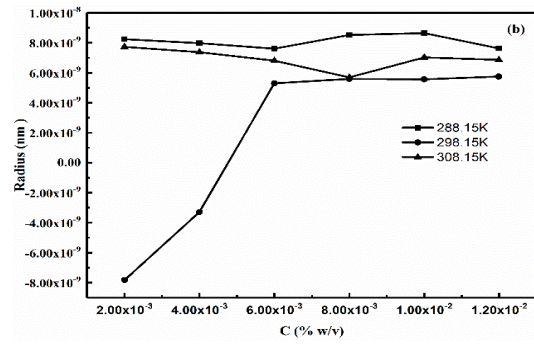

SI Figs.1.3. Radius vs (a) T/K, (b) conc. of aq-GO.

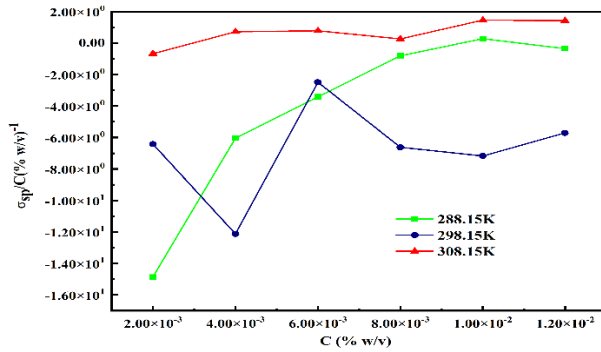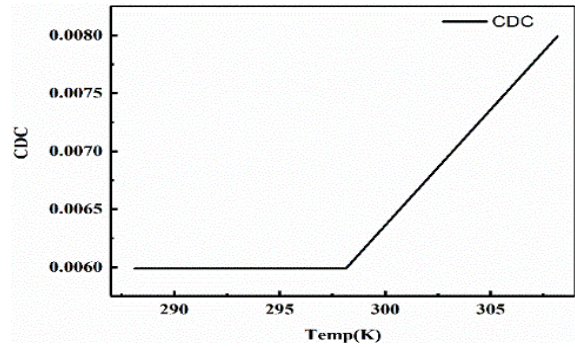

SI Figs.1.4  $\sigma_{sp}/c$  vs onc. of aq-GO.

ESI fig.1.5 CDC vs T/K of aq-GO.

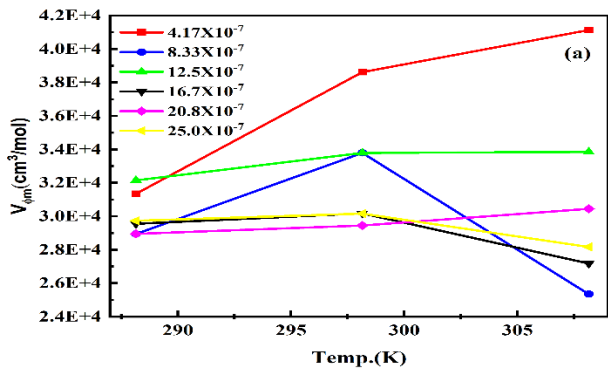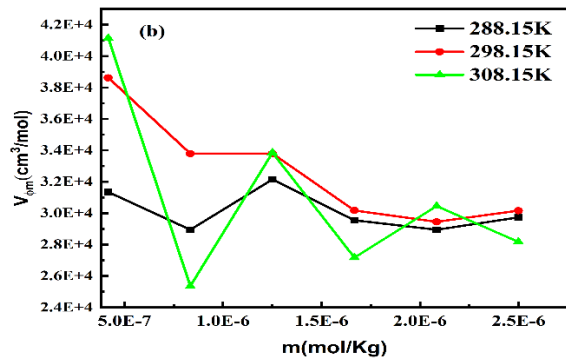

SI Figs.1.6.  $v_{fm}$  vs (a) T/K (b) molality of aq-GO.

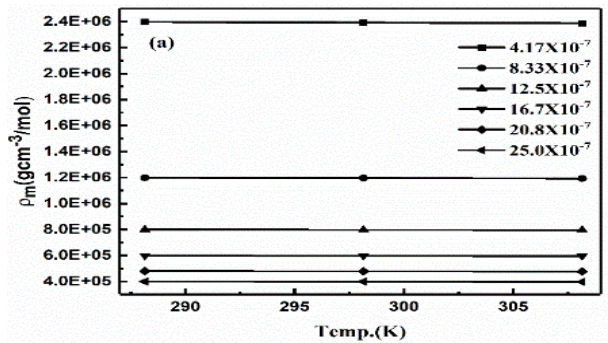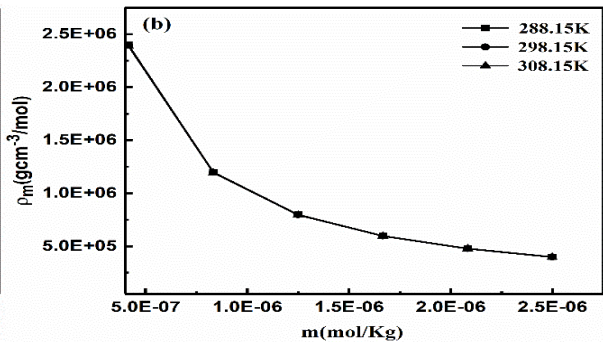

SI Figs.1.7  $\rho_m$  vs (a) T/K (b) molality of aq-GO.

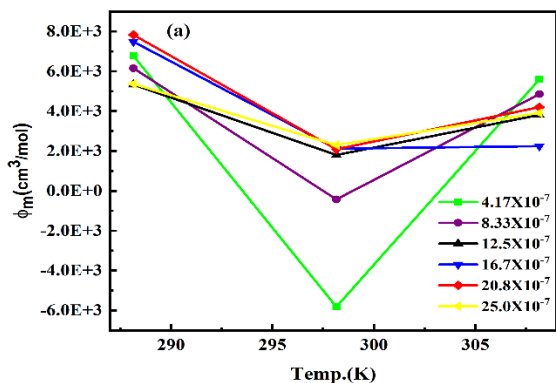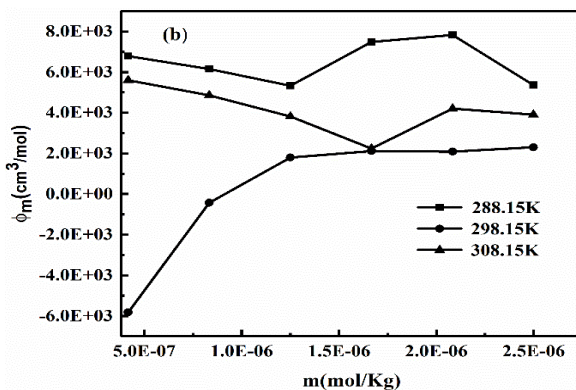

SI Figs. 1.8  $\phi_m$  vs (a) T/K (b) molality of aq-GO.

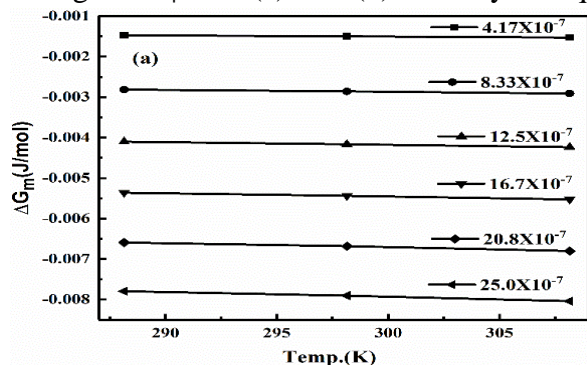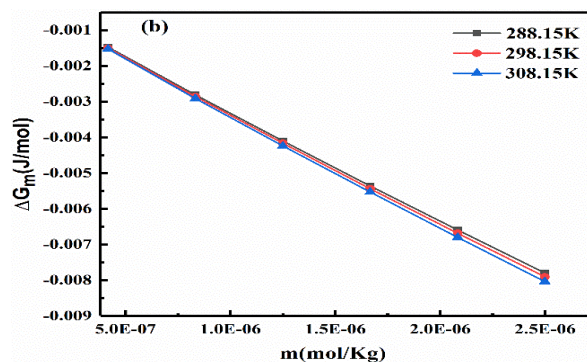

SI Figs.1.9  $\Delta G_m$  vs (a) T/K s (b) molality of aq-GO.

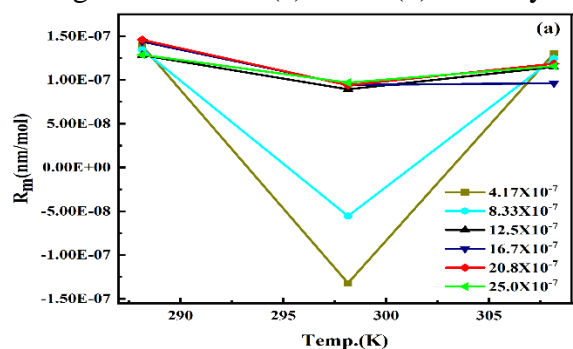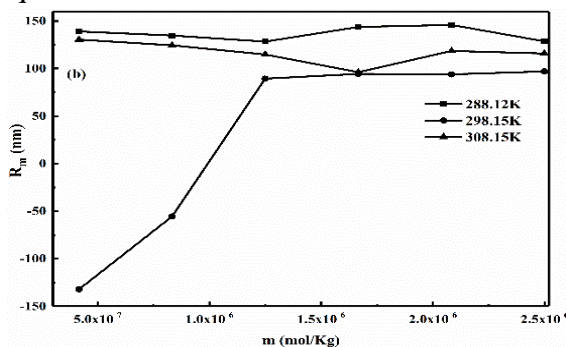

SI Figs.2.0  $R_m$  vs (a) T/K (b) molality of aq-GO.

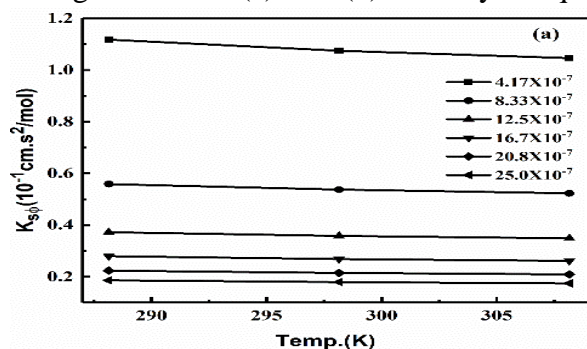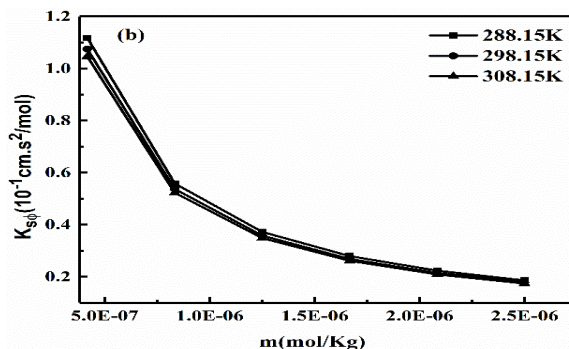

SI Figs.2.1  $K_{S\phi m}$  vs (a) T/K (b) molality of aq-GO.

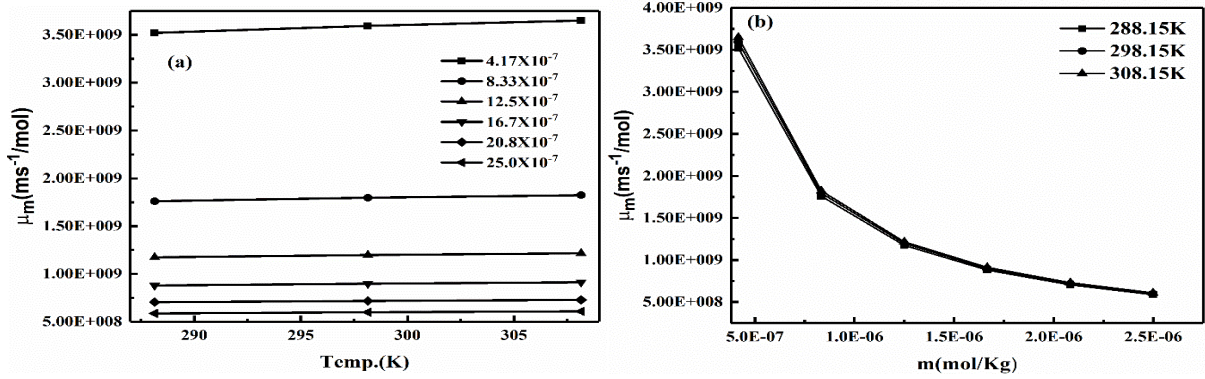

SI Figs.2.2  $\mu_m$  vs (a) molality (b) T/K of aq-GO.

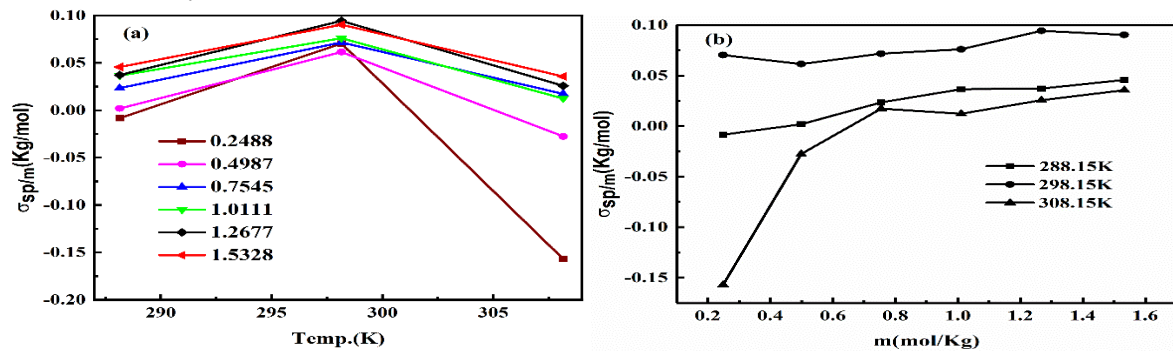

SI Figs.2.3  $\sigma_{sp/m}$  vs (a) T/K (b) molality, aq-NaCl.

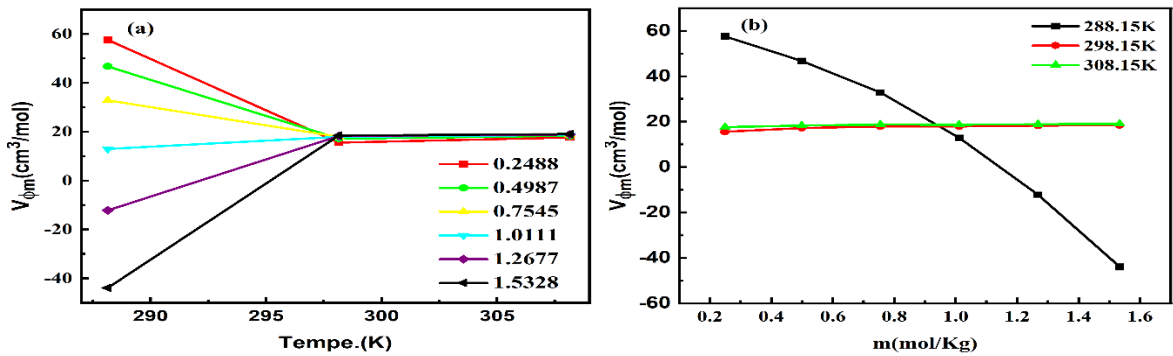

SI Figs.2.4  $V_{\phi m}$  vs (a) T/K (b) molality, aq-NaCl.

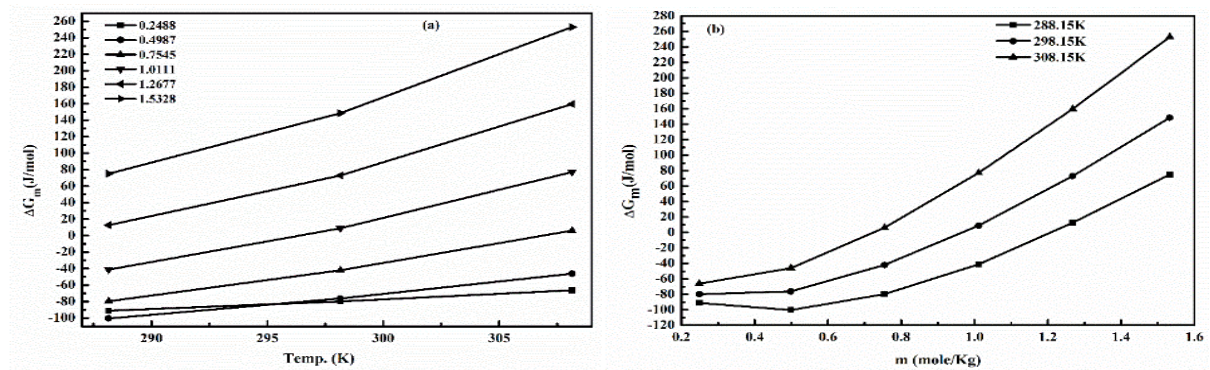

SI Figs.2.5  $\Delta G_m$  vs (a) T/K (b) molality, aq-NaCl.

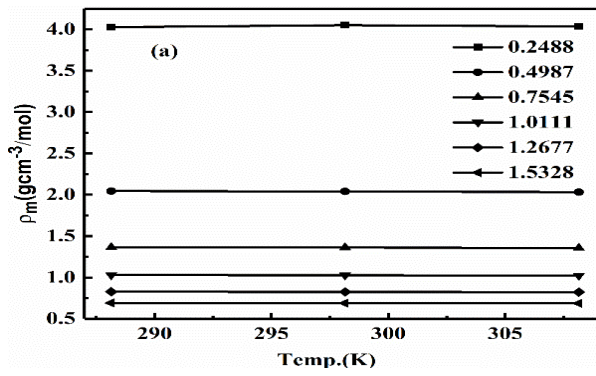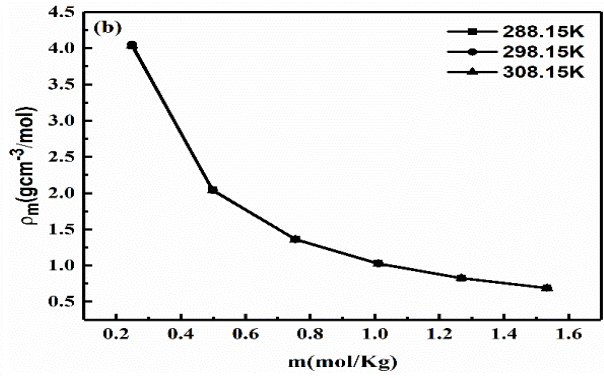

SI Figs.2.6  $\rho_m$  vs (a) T/K (b) molality, aq-NaCl.

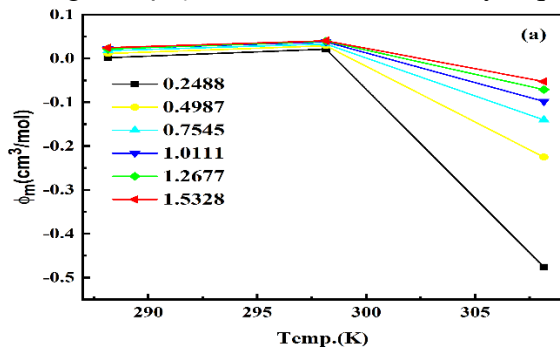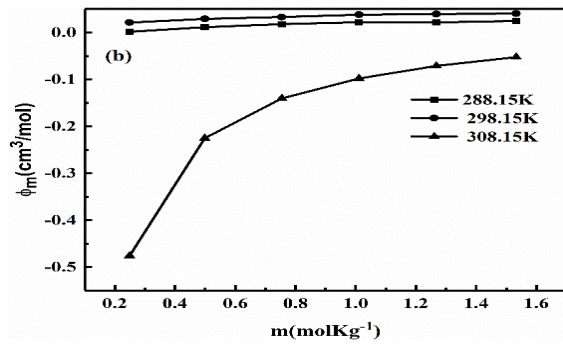

SI Figs.2.7  $\phi_m$  vs (a) T/K (b) molality, aq-NaCl.

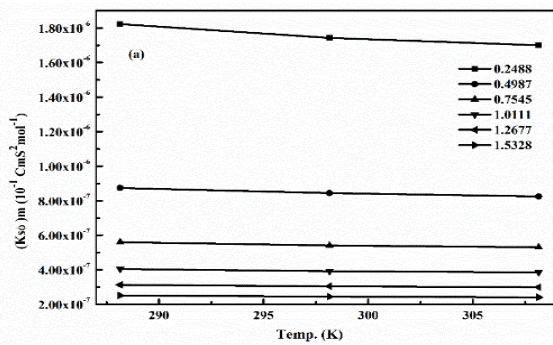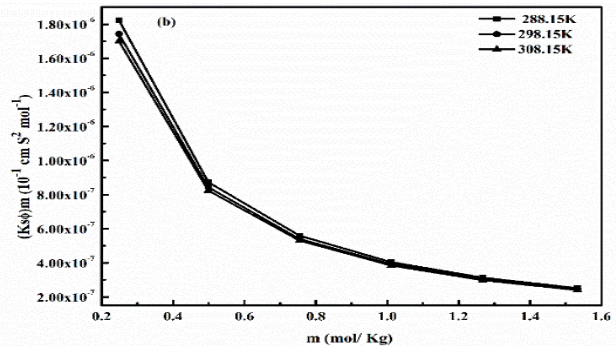

SI Figs.2.8  $K_{S\phi m}$  vs (a) T/K (b) molality, aq-NaCl.

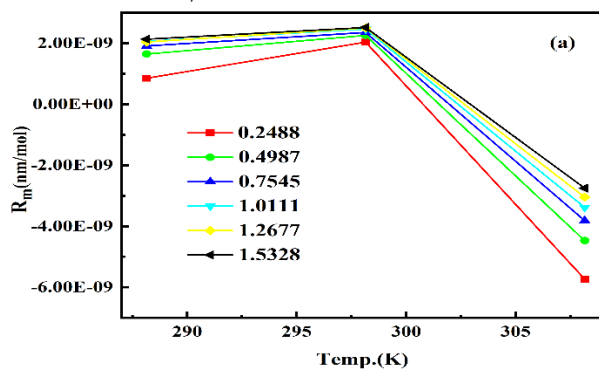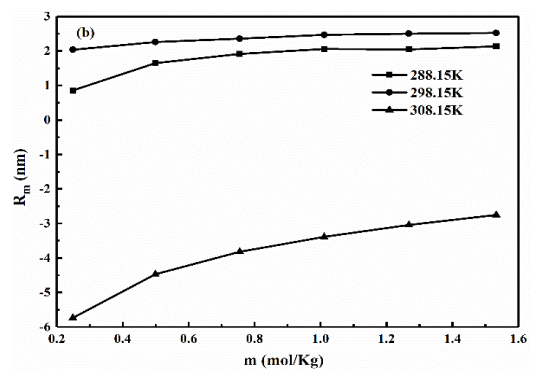

SI Figs.2.9  $R_m$  vs (a) T/K (b) molality, aq-NaCl.

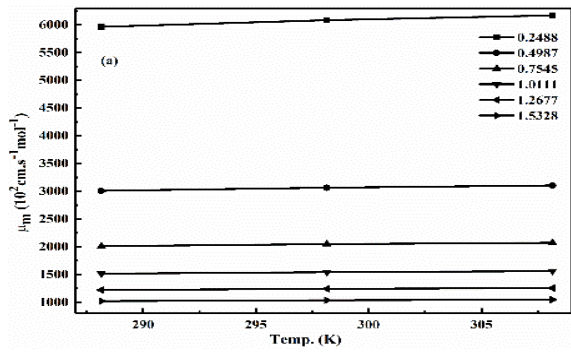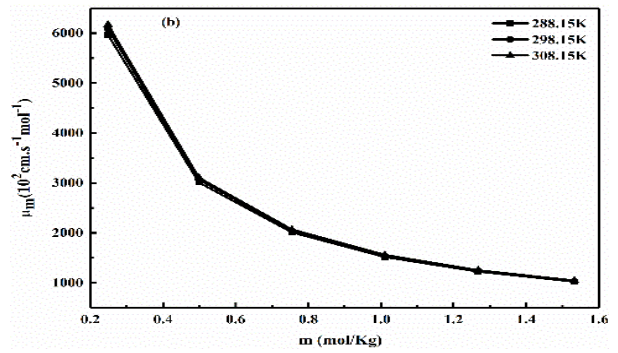

SI Figs.3.0  $\mu_m$  vs (a) T/K (b) molality, aq-NaCl.

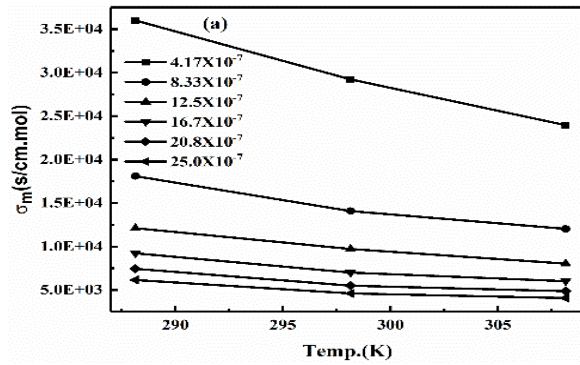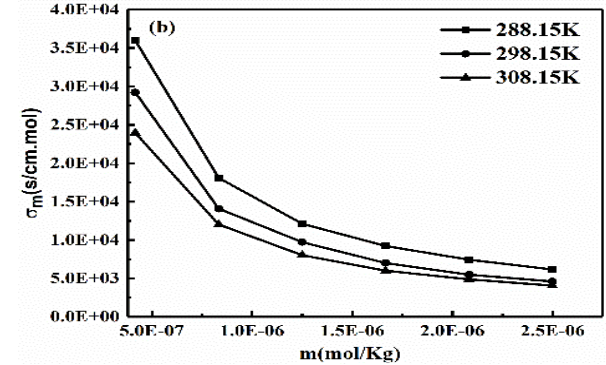

SI Figs.3.1  $\sigma_m$  vs (a) T/K (b) molality of aq-GO.

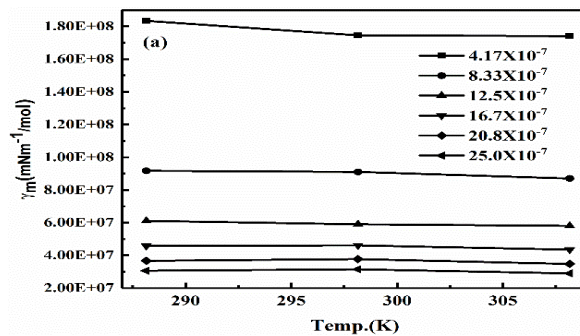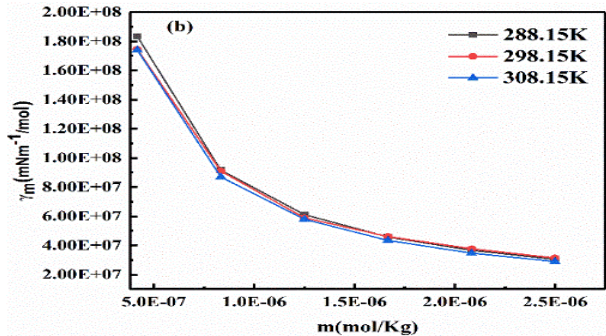

SI Figs.3.2  $\gamma$  vs (a) T/K (b) molality of aq-GO.

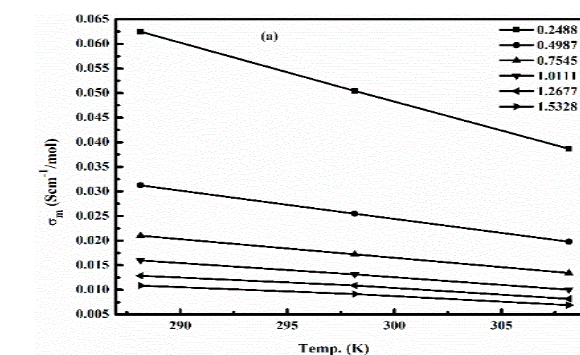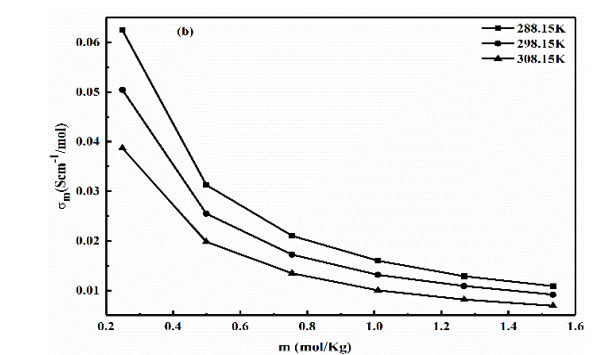

SI Figs.3.3  $\sigma_m$  vs (a) T/K (b) molality, aq-NaCl.

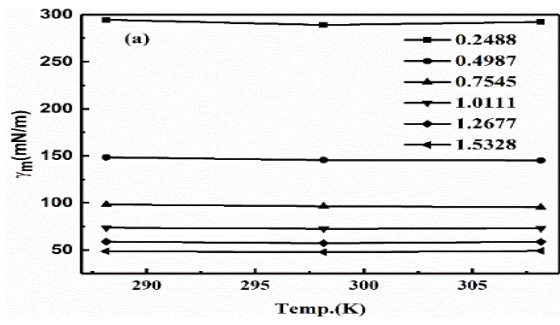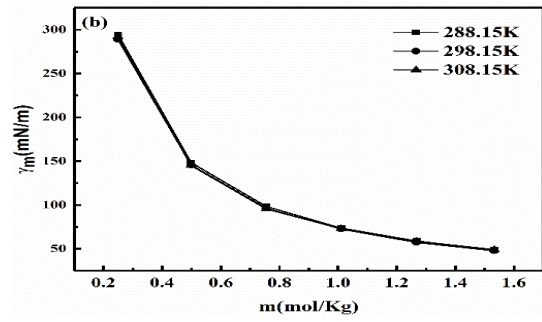

SI Figs.3.4.  $\gamma_m$  vs (a) T/K (b) molality, aq-NaCl.

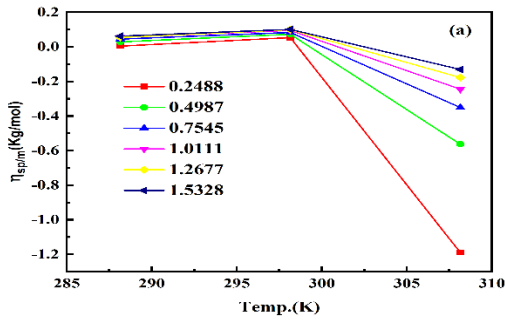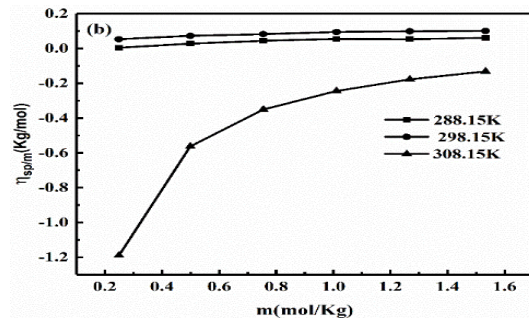

SI Figs.3.5  $\eta_{sp}/m$  vs (a) T/K (b) molality, aq-NaCl.

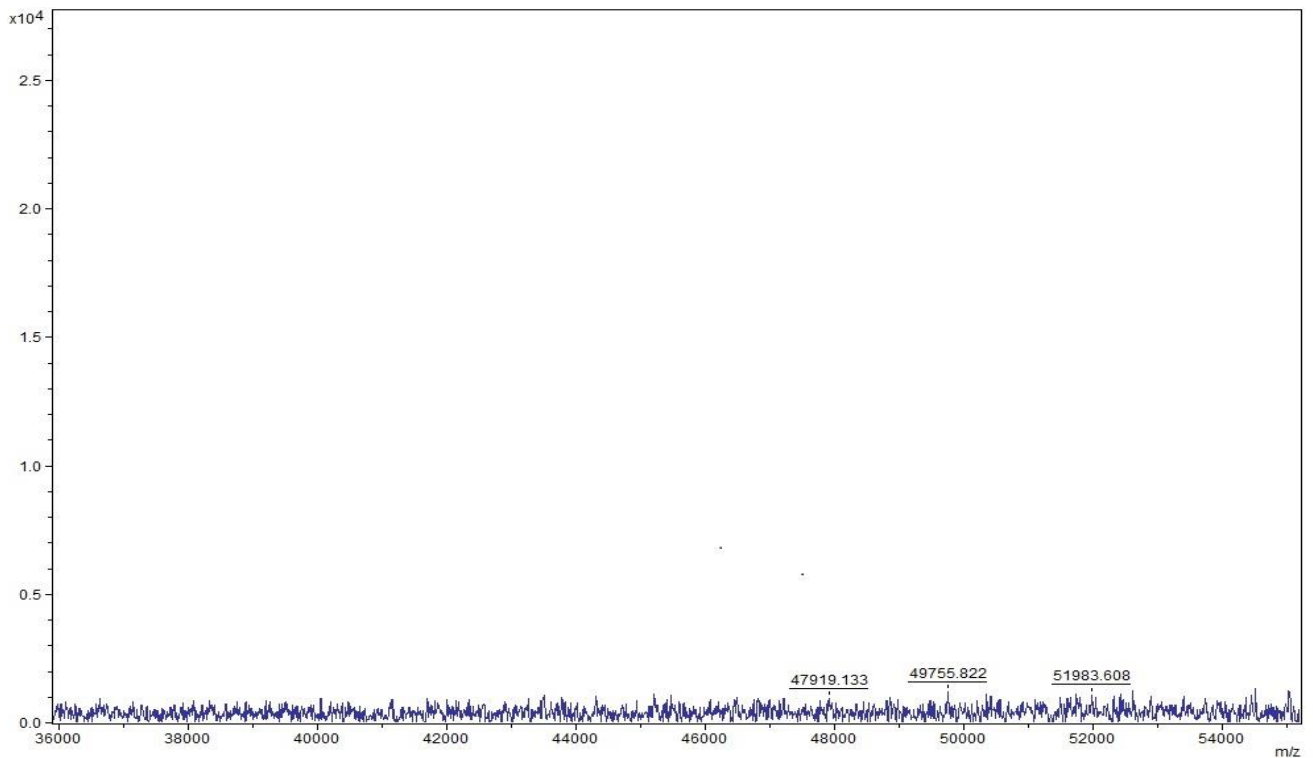

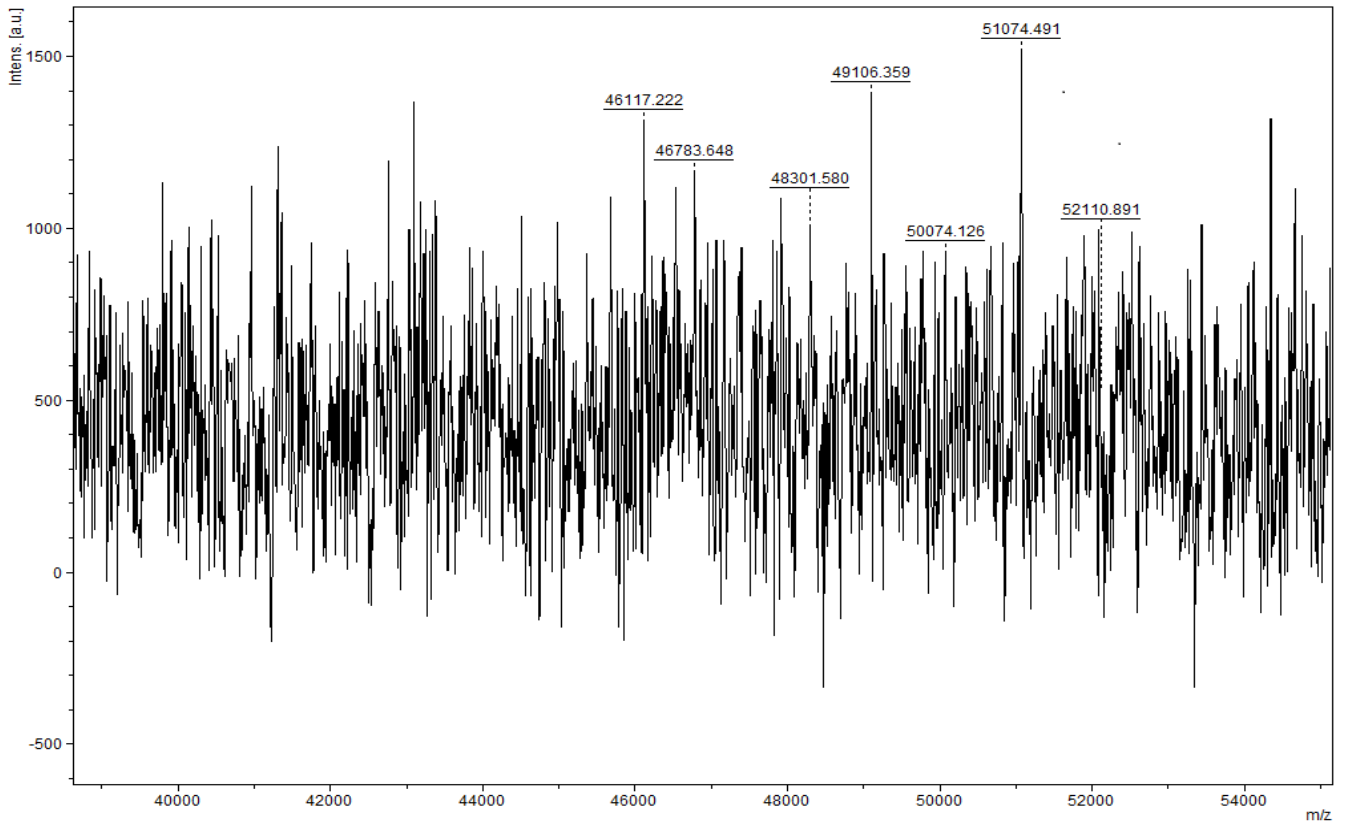

SI Figs.3.6. MALDI-TOF plots for  $M_v$  determination of aq-GO.

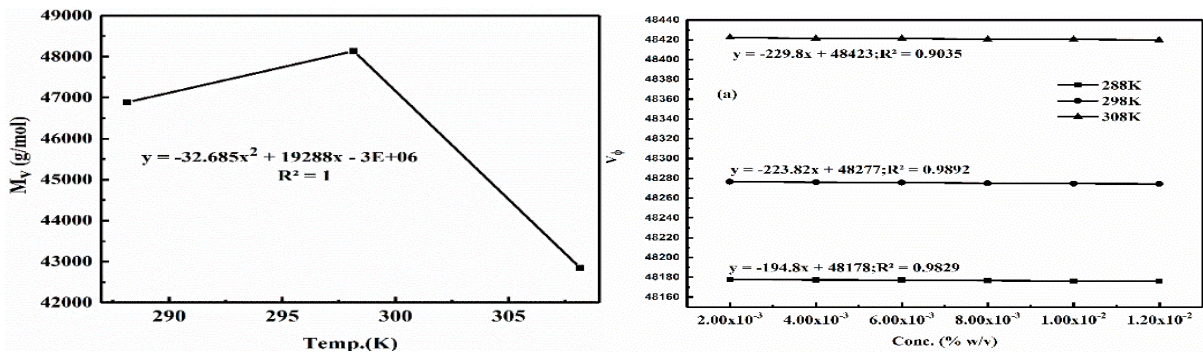

SI Figs.3.7.  $M_v$  vs T/K of aq-GO

ESI Figs.3.8 (a)  $V_\phi$  vs concentration.

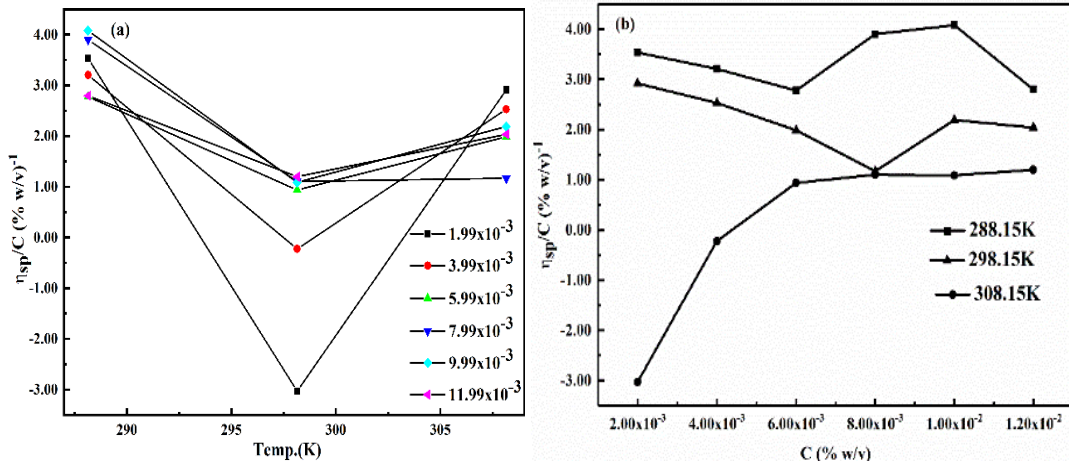

SI Figs.3.9.  $\eta_{sp}/c$  vs (a) temperature and, (b) conc. of aq-GO.



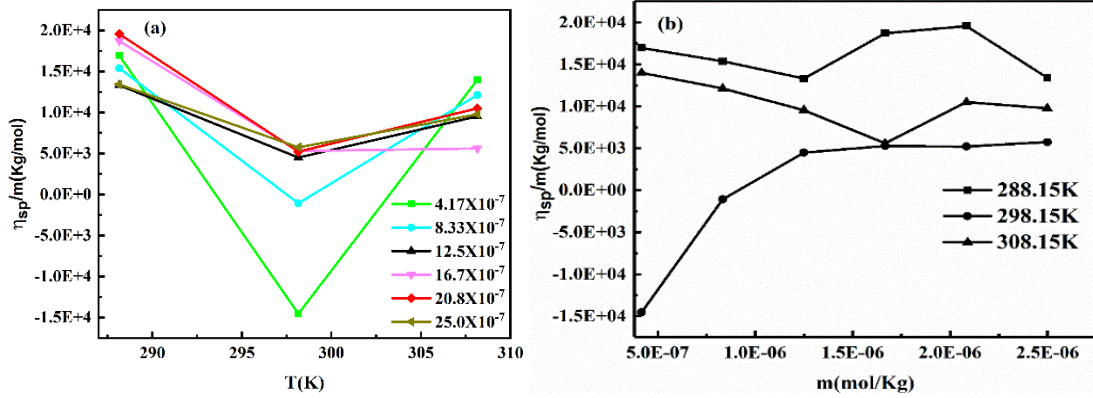

SI Figs.4.0. (a) The  $\eta_{sp}/m$  vs temperature and (b)  $\eta_{sp}/m$  vs molality of aq-GO.

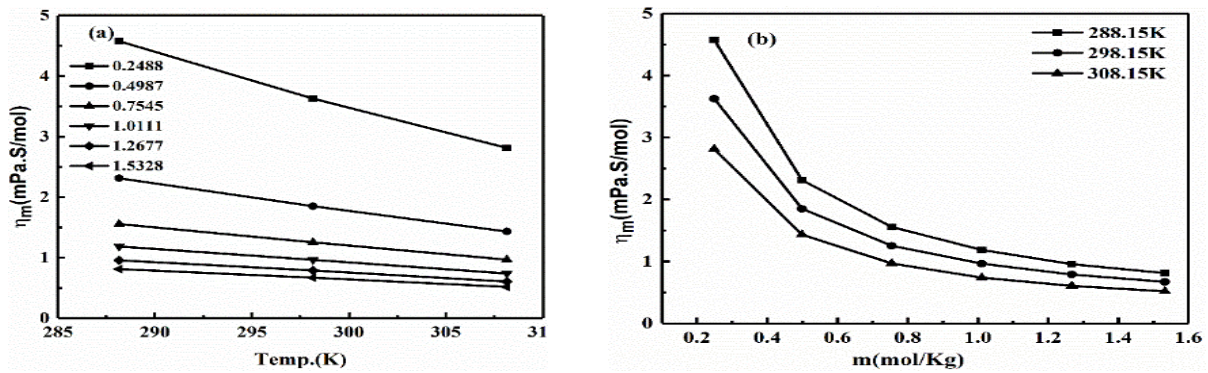

SI Figs.4.1. (a) Molar viscosity vs temperature and (b) Molar viscosity vs molality of aq-NaCl.

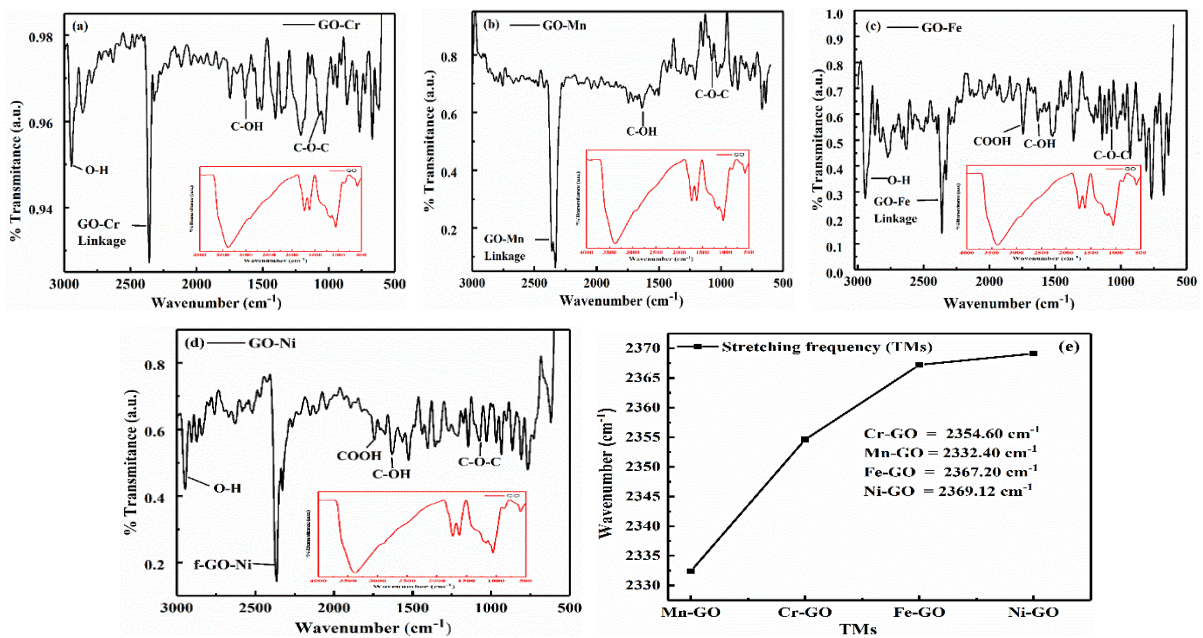

SI Figs.4.2. FT-IR spectra of TMIs-GO and compared with GO insite.

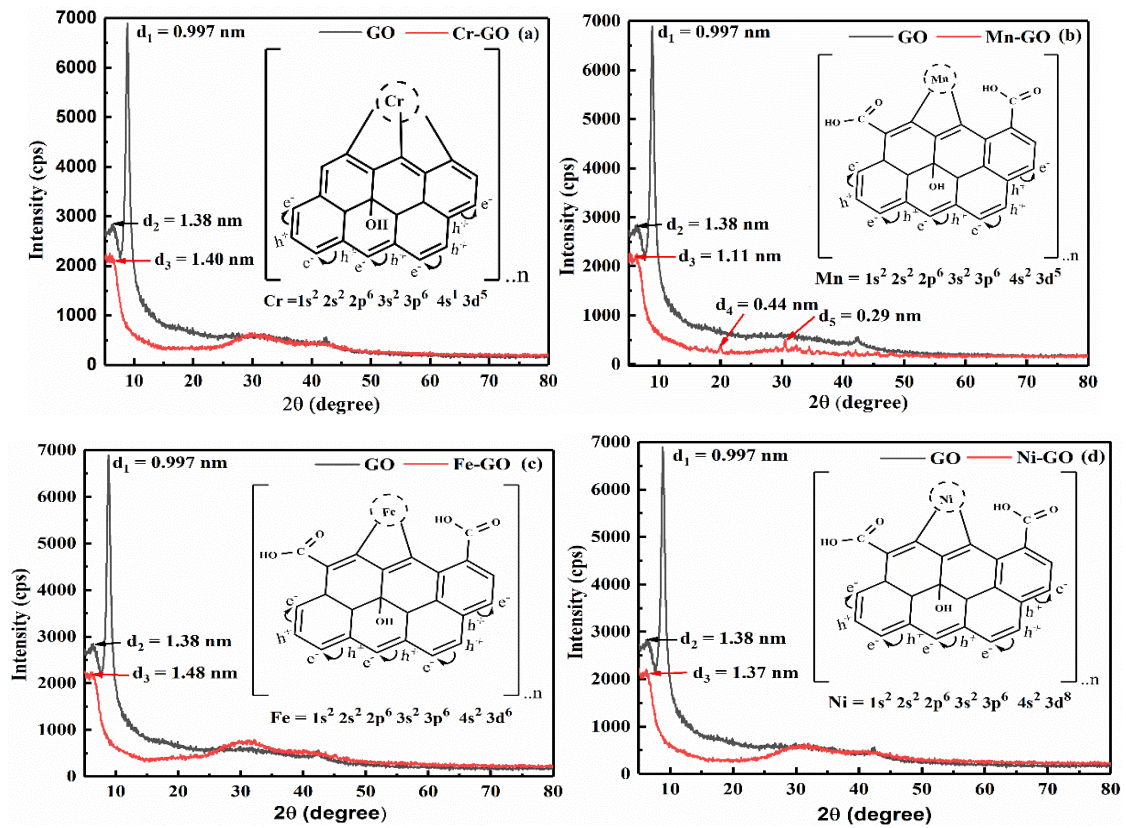

SI Figs.4.3. XRD, TMIs-GO compared with GO.

### Tables

SI, table 1.0. The constant (a)  $\gamma$  vs T/K, (b)  $\gamma$  vs conc. of aq-GO (SI, Fig.1.0).

| Fig. (a) $\gamma$ vs T/K |            |           |         | Fig. (b) $\gamma$ vs conc. |           |        |
|--------------------------|------------|-----------|---------|----------------------------|-----------|--------|
| Sr.no.                   | Conc. (g%) | Intercept | Slope   | T(K)                       | Intercept | Slope  |
| 1                        | 0.002      | 1,680.60  | - 10.59 | 288.15                     | 76.39     | 0.28   |
| 2                        | 0.004      | -1,085.48 | 7.98    | 298.15                     | 71.89     | 607.38 |
| 3                        | 0.006      | 784.10    | - 4.57  | 308.15                     | 72.49     | 0.33   |
| 4                        | 0.008      | -2,061.26 | 14.54   |                            |           |        |
| 5                        | 0.010      | -3,579.11 | 24.73   |                            |           |        |
| 6                        | 0.012      | -3,578.91 | 24.73   |                            |           |        |

Units: Intercepts (m N/m), slope: a (m N/m K), b (m N cm<sup>3</sup>/m g).

SI, table 1.1. The constant of (a)  $\rho$  vs T/K (b)  $\rho$  vs conc. of aq-GO (SI, Fig.1.1).

| Fig. (a) $\rho$ vs T/K |            |           |          | Fig. (b) $\rho$ vs conc. |           |          |
|------------------------|------------|-----------|----------|--------------------------|-----------|----------|
| Sr.no.                 | Conc. (g%) | Intercept | Slope    | T(K)                     | Intercept | Slope    |
| 1                      | 0.002      | 0.648508  | 0.002590 | 288.15                   | 0.999080  | 0.003648 |
| 2                      | 0.004      | 0.644604  | 0.002616 | 298.15                   | 0.997039  | 0.004121 |
| 3                      | 0.006      | 0.644589  | 0.002616 | 308.15                   | 0.994040  | 0.004552 |
| 4                      | 0.008      | 0.646289  | 0.002605 |                          |           |          |
| 5                      | 0.010      | 0.643291  | 0.002625 |                          |           |          |

|   |       |          |          |  |  |
|---|-------|----------|----------|--|--|
| 6 | 0.012 | 0.646304 | 0.002605 |  |  |
|---|-------|----------|----------|--|--|

Units: Intercepts ( $\text{g}/\text{cm}^3$ ), slope: a ( $\text{g}/\text{cm}^3 \text{K}$ ).

SI, table 1.2. The constant (a)  $\Delta G$  vs T/K (b)  $\Delta G$  vs conc. of aq-GO (SI, Fig.1.2).

| Fig. (a) $\Delta G$ vs T/K |            |                         |                     | Fig. (b) $\Delta G$ vs conc. |                         |                     |
|----------------------------|------------|-------------------------|---------------------|------------------------------|-------------------------|---------------------|
| Sr.no.                     | Conc. (g%) | Intercept ( $10^{-3}$ ) | Slope ( $10^{-5}$ ) | T(K)                         | Intercept ( $10^{-6}$ ) | Slope ( $10^{-3}$ ) |
| 1                          | 0.002      | -2.57                   | 1.49                | 288.15                       | 3.60                    | -7.93               |
| 2                          | 0.004      | -5.11                   | 2.96                | 298.15                       | 1.12                    | 5.92                |
| 3                          | 0.006      | -6.64                   | 3.75                | 308.15                       | -1.93                   | 18.30               |
| 4                          | 0.008      | -9.82                   | 5.62                |                              |                         |                     |
| 5                          | 0.010      | -16.30                  | 9.72                |                              |                         |                     |
| 6                          | 0.012      | -6.40                   | 9.59                |                              |                         |                     |

Units: Intercepts (J), slope: a (J/K), b ( $\text{J cm}^3/\text{g}$ ).

SI, table 1.3. The constant (a) radius vs T/K (b) radius vs conc. of aq-GO (SI, Fig.1.3).

| Fig. (a) radius vs T/K |            |                         |                     | Fig. (b) radius vs conc. |                         |                     |
|------------------------|------------|-------------------------|---------------------|--------------------------|-------------------------|---------------------|
| Sr.no.                 | Conc. (g%) | Intercept ( $10^{-6}$ ) | Slope ( $10^{-8}$ ) | T(K)                     | Intercept ( $10^{-9}$ ) | Slope ( $10^{-7}$ ) |
| 1                      | 0.002      | 14.10                   | -9.44               | 288.15                   | 7.83                    | 1.08                |
| 2                      | 0.004      | 9.76                    | -6.54               | 298.15                   | -17.00                  | 48.70               |
| 3                      | 0.006      | 1.71                    | -1.14               | 308.15                   | 8.99                    | -6.28               |
| 4                      | 0.008      | 1.40                    | -0.92               |                          |                         |                     |
| 5                      | 0.010      | 2.05                    | -1.36               |                          |                         |                     |
| 6                      | 0.012      | 1.35                    | -0.90               |                          |                         |                     |

Units: Intercepts (nm), slope: a (nm/K), b ( $\text{nm cm}^3/\text{g}$ ).

SI, table 1.6. The constant of (a)  $v_{\phi m}$  vs T/K (b)  $v_{\phi m}$  vs molality of aq-GO (SI, Fig.1.6).

| Fig. (a) $v_{\phi m}$ vs T/K |                        |                      |                  | Fig. (b) $v_{\phi m}$ vs m |                      |                  |
|------------------------------|------------------------|----------------------|------------------|----------------------------|----------------------|------------------|
| Sr.no.                       | Molality ( $10^{-7}$ ) | Intercept ( $10^5$ ) | Slope ( $10^3$ ) | T(K)                       | Intercept ( $10^4$ ) | Slope ( $10^8$ ) |
| 1                            | 4.17                   | -22.20               | 14.70            | 288.15                     | 3.13                 | -9.38            |
| 2                            | 8.33                   | -58.20               | 39.50            | 298.15                     | 4.27                 | -115.00          |
| 3                            | 12.5                   | -6.96                | 4.81             | 308.15                     | 4.44                 | -179.00          |
| 4                            | 16.7                   | -15.50               | 10.70            |                            |                      |                  |
| 5                            | 20.8                   | 2.30                 | -1.42            |                            |                      |                  |
| 6                            | 25.0                   | -10.20               | 7.12             |                            |                      |                  |

Units: Intercepts ( $\text{cm}^3/\text{mol}$ ), slope: a ( $\text{cm}^3/\text{mol K}$ ), b ( $10^3 \text{g cm}^3/\text{mol}^2$ ).

SI, table 1.7. The constant of (a)  $\rho_m$  vs T/K (b)  $\rho_m$  vs molality of aq-GO (SI, Fig.1.7).

| Fig. (a) $\rho_m$ vs T/K |                        |                      |                  | Fig. (b) $\rho_m$ vs m |                      |                     |
|--------------------------|------------------------|----------------------|------------------|------------------------|----------------------|---------------------|
| Sr.no.                   | Molality ( $10^{-7}$ ) | Intercept ( $10^5$ ) | Slope ( $10^3$ ) | T(K)                   | Intercept ( $10^6$ ) | Slope ( $10^{12}$ ) |
| 1                        | 4.17                   | 15.475390            | 6.280868         | 288.15                 | 3.334620             | -2.863902           |

|   |      |          |          |        |          |           |
|---|------|----------|----------|--------|----------|-----------|
| 2 | 8.33 | 7.782514 | 3.107829 | 298.15 | 3.327813 | -2.858055 |
| 3 | 12.5 | 5.156558 | 2.092981 | 308.15 | 3.317799 | -2.849449 |
| 4 | 16.7 | 3.877371 | 1.562660 |        |          |           |
| 5 | 20.8 | 3.087397 | 1.259931 |        |          |           |
| 6 | 25.0 | 2.586741 | 1.042485 |        |          |           |

Units: Intercepts ( $\text{g}/\text{cm}^3 \text{ mol}$ ), slope: a ( $\text{g}/\text{cm}^3 \text{ mol K}$ ), b ( $10^3 \text{g}^2 / \text{cm}^3 \text{ mol}^2$ ).

SI, table 1.8. The constant (a)  $\phi_m$  vs T/K (b)  $\phi_m$  vs molality of aq-GO (SI, Fig.1.8).

| Fig. (a) $\phi_m$ vs T/K |                           |                         |                     | Fig. (b) $\phi_m$ vs m |                      |                 |
|--------------------------|---------------------------|-------------------------|---------------------|------------------------|----------------------|-----------------|
| Sr.n<br>o.               | Molality<br>( $10^{-7}$ ) | Intercept<br>( $10^6$ ) | Slope<br>( $10^4$ ) | T(K)                   | Intercept ( $10^3$ ) | Slope( $10^9$ ) |
| 1                        | 4.17                      | 10.70                   | - 7.17              | 288.15                 | 5.74                 | 1.34            |
| 2                        | 8.33                      | 5.29                    | - 3.55              | 298.15                 | -10.30               | 13.80           |
| 3                        | 12.5                      | 2.49                    | - 1.66              | 308.15                 | 7.67                 | -5.10           |
| 4                        | 16.7                      | 2.52                    | - 1.66              |                        |                      |                 |
| 5                        | 20.8                      | 3.55                    | - 2.36              |                        |                      |                 |
| 6                        | 25.0                      | 2.10                    | - 1.40              |                        |                      |                 |

Units: Intercepts ( $\text{cm}^3/\text{mol}$ ), slope: a ( $\text{cm}^3/\text{mol K}$ ), b ( $10^3 \text{g cm}^3/\text{mol}^2$ ).

SI, table 1.9. The constant (a)  $\Delta G_m$  vs T/K (b)  $\Delta G_m$  vs molality of aq-GO (SI, Fig.1.9).

| Fig. (a) $\Delta G_m$ vs T/K |                        |                         |                    | Fig. (b) $\Delta G_m$ vs m |                         |                  |
|------------------------------|------------------------|-------------------------|--------------------|----------------------------|-------------------------|------------------|
| Sr.no.                       | Molality ( $10^{-7}$ ) | Intercept ( $10^{-3}$ ) | Slope( $10^{-5}$ ) | T(K)                       | Intercept ( $10^{-4}$ ) | Slope ( $10^3$ ) |
| 1                            | 4.17                   | - 2.57                  | 0.99               | 288.15                     | - 1.00                  | - 3.30           |
| 2                            | 8.33                   | - 5.11                  | 1.99               | 298.15                     | - 1.29                  | - 3.34           |
| 3                            | 12.5                   | - 6.64                  | 2.34               | 308.15                     | - 1.37                  | - 3.40           |
| 4                            | 16.7                   | - 9.82                  | 3.78               |                            |                         |                  |
| 5                            | 20.8                   | - 16.30                 | 7.46               |                            |                         |                  |
| 6                            | 25.0                   | - 16.40                 | 6.92               |                            |                         |                  |

Units: Intercepts ( $\text{J}/\text{mol}$ ), slope: a ( $\text{J}/\text{mol K}$ ), b ( $10^3 \text{g J}/\text{mol}^2$ ).

SI, table 2.0. The constant of (a)  $R_m$  vs T/K (b)  $R_m$  vs molality of aq-GO (SI, Fig.2.0).

| Fig. (a) $R_m$ vs T/K |                        |                      |                  | Fig. (b) $R_m$ vs m |                      |                  |
|-----------------------|------------------------|----------------------|------------------|---------------------|----------------------|------------------|
| Sr.no.                | Molality ( $10^{-7}$ ) | Intercept ( $10^4$ ) | Slope ( $10^2$ ) | T(K)                | Intercept ( $10^2$ ) | Slope ( $10^6$ ) |
| 1                     | 4.17                   | 23.72                | -15.92           | 288.15              | 1.32                 | 8.77             |
| 2                     | 8.33                   | 16.46                | -11.04           | 298.15              | -2.87                | 394.36           |
| 3                     | 12.5                   | 2.89                 | -1.93            | 308.15              | 1.52                 | - 50.80          |
| 4                     | 16.7                   | 2.36                 | -1.55            |                     |                      |                  |
| 5                     | 20.8                   | 3.46                 | -2.30            |                     |                      |                  |
| 6                     | 25.0                   | 2.27                 | -1.51            |                     |                      |                  |

Units: Intercepts (nm/mol), slope: a (nm/K), b ( $10^3$  nm g/mol).

SI, table 2.1. The constant (a)  $K_{S\phi m}$  vs T/K (b)  $K_{S\phi m}$  vs molality of aq-GO (SI, Fig.2.1).

| Fig. (a) $K_{S\phi m}$ vs T/K |                        |           |                     | Fig. (b) $K_{S\phi m}$ vs m |           |                  |
|-------------------------------|------------------------|-----------|---------------------|-----------------------------|-----------|------------------|
| Sr.no.                        | Molality ( $10^{-7}$ ) | Intercept | Slope ( $10^{-2}$ ) | T(K)                        | Intercept | Slope ( $10^6$ ) |
| 1                             | 4.17                   | 8.15      | - 4.39              | 288.15                      | 1.55      | - 1.33           |
| 2                             | 8.33                   | 4.15      | - 2.24              | 298.15                      | 1.49      | - 1.28           |
| 3                             | 12.5                   | 2.67      | - 1.43              | 308.15                      | 1.45      | - 1.25           |
| 4                             | 16.7                   | 2.08      | - 1.12              |                             |           |                  |
| 5                             | 20.8                   | 1.60      | - 0.86              |                             |           |                  |
| 6                             | 25.0                   | 1.36      | - 0.73              |                             |           |                  |

Units: Intercepts ( $10^{-1}$  cm s<sup>2</sup>/mol), slope: a ( $10^{-1}$  cm s<sup>2</sup>/mol K), b ( $10^2$  g cm s<sup>2</sup>/mol<sup>2</sup>).

SI, table 2.2. The constant of (a)  $\mu_m$  vs T/K (b)  $\mu_m$  vs molality of aq-GO (SI, Fig.2.2).

| Fig. (a) $\mu_m$ vs T/K |                        |                     |                 | Fig. (b) $\mu_m$ vs m |                      |                     |
|-------------------------|------------------------|---------------------|-----------------|-----------------------|----------------------|---------------------|
| Sr.no.                  | Molality ( $10^{-7}$ ) | Intercept( $10^9$ ) | Slope( $10^7$ ) | T(K)                  | Intercept ( $10^9$ ) | Slope ( $10^{15}$ ) |
| 1                       | 4.17                   | - 6.15              | 5.90            | 288.15                | 4.89                 | - 4.20              |
| 2                       | 8.33                   | - 3.21              | 3.04            | 298.15                | 5.00                 | - 4.29              |
| 3                       | 12.5                   | - 1.97              | 1.92            | 308.15                | 5.07                 | - 4.36              |
| 4                       | 16.7                   | - 1.60              | 1.52            |                       |                      |                     |
| 5                       | 20.8                   | - 1.18              | 1.14            |                       |                      |                     |
| 6                       | 25.0                   | - 1.03              | 0.98            |                       |                      |                     |

Units: Intercepts ( $10^2$  cm /s mol), slope: a ( $10^2$  cm/s mol K), b ( $10^5$  g cm/ s mol<sup>2</sup>).

SI, table 2.3. The constant of (a)  $\sigma_{sp/m}$  vs T/K (b)  $\sigma_{sp/m}$  vs molality of aq-NaCl (SI, Fig.2.3).

| Fig. (a) $\sigma_{sp/m}$ vs T/K |          |           |       | Fig. (b) $\sigma_{sp/m}$ vs m |                         |                     |
|---------------------------------|----------|-----------|-------|-------------------------------|-------------------------|---------------------|
| Sr.no.                          | Molality | Intercept | Slope | T(K)                          | Intercept ( $10^{-2}$ ) | Slope ( $10^{-3}$ ) |
| 1                               | 0.2488   | - 133.74  | 0.91  | 288.15                        | -3.12                   | 89.60               |
| 2                               | 0.4987   | - 65.59   | 0.44  | 298.15                        | 6.59                    | - 2.74              |
| 3                               | 0.7545   | - 45.48   | 0.31  | 308.15                        | -24.30                  | 473.00              |
| 4                               | 1.0111   | - 45.44   | 0.31  |                               |                         |                     |
| 5                               | 1.2677   | - 55.64   | 0.37  |                               |                         |                     |
| 6                               | 1.5328   | - 43.84   | 0.30  |                               |                         |                     |

Units: Intercepts ( $10^3$  g /mol), slope: a ( $10^3$  g /mol K), b ( $10^6$  g<sup>2</sup> /mol<sup>2</sup>).

SI, table 2.4. The constant of (a)  $V_{\phi m}$  vs T/K (b)  $V_{\phi m}$  vs molality of aq-NaCl (SI, Fig.2.4).

| Fig. (a) $V_{\phi m}$ vs T/K |          |           |         | Fig. (b) $V_{\phi m}$ vs m |           |       |
|------------------------------|----------|-----------|---------|----------------------------|-----------|-------|
| Sr.no.                       | Molality | Intercept | Slope   | T(K)                       | Intercept | Slope |
| 1                            | 0.2488   | 20225.00  | -133.57 | 288.15                     | 61.87     | -9.44 |

|   |        |           |        |        |       |      |
|---|--------|-----------|--------|--------|-------|------|
| 2 | 0.4987 | 14078.03  | -92.90 | 298.15 | 14.31 | 6.33 |
| 3 | 0.7545 | 7245.01   | -47.78 | 308.15 | 17.14 | 2.58 |
| 4 | 1.0111 | -1987.06  | 13.16  |        |       |      |
| 5 | 1.2677 | -13688.87 | 90.39  |        |       |      |
| 6 | 1.5328 | -28352.61 | 187.17 |        |       |      |

Units: Intercepts ( $\text{cm}^3/\text{mol}$ ), slope: a ( $\text{cm}^3/\text{mol K}$ ), b ( $10^3 \text{g cm}^3/\text{mol}^2$ ).

SI, table 2.5. The constant of (a)  $\Delta G_m$  vs T/K (b)  $\Delta G_m$  vs molality of aq-NaCl (SI, Fig.2.5).

| Fig. (a) $\Delta G_m$ vs T/K |          |           |        | Fig. (b) $\Delta G_m$ vs m |           |        |
|------------------------------|----------|-----------|--------|----------------------------|-----------|--------|
| Sr.no.                       | Molality | Intercept | Slope  | T(K)                       | Intercept | Slope  |
| 1                            | 0.2488   | 584.01    | -5.70  | 288.15                     | -79.24    | -95.56 |
| 2                            | 0.4987   | 1761.69   | -15.05 | 298.15                     | -81.40    | -40.33 |
| 3                            | 0.7545   | 3341.42   | -26.99 | 308.15                     | -86.13    | 30.74  |
| 4                            | 1.0111   | 6393.41   | -48.75 |                            |           |        |
| 5                            | 1.2677   | 9670.63   | -71.73 |                            |           |        |
| 6                            | 1.5328   | 11248.03  | -83.36 |                            |           |        |

Units: Intercepts ( $\text{J/mol}$ ), slope: a ( $\text{J/mol K}$ ), b ( $10^3 \text{g J/mol}^2$ ).

SI, table 2.6. The constant of (a)  $\rho_m$  vs T/K (b)  $\rho_m$  vs molality of aq-NaCl (SI, Fig.2.6).

| Fig. (a) $\rho_m$ vs T/K |          |            |          | Fig. (b) $\rho_m$ vs m |           |           |
|--------------------------|----------|------------|----------|------------------------|-----------|-----------|
| Sr.no.                   | Molality | Intercept  | Slope    | T(K)                   | Intercept | Slope     |
| 1                        | 0.2488   | -12.246802 | 0.108929 | 288.15                 | 5.521341  | -7.712194 |
| 2                        | 0.4987   | 1.202354   | 0.006226 | 298.15                 | 5.555010  | -7.788611 |
| 3                        | 0.7545   | 0.877406   | 0.003668 | 308.15                 | 5.535535  | -7.761448 |
| 4                        | 1.0111   | 0.773624   | 0.002026 |                        |           |           |
| 5                        | 1.2677   | 0.682788   | 0.001239 |                        |           |           |
| 6                        | 1.5328   | 0.563312   | 0.001087 |                        |           |           |

Units: Intercepts ( $\text{g/cm}^3 \text{ mol}$ ), slope: a ( $\text{g/cm}^3 \text{ mol K}$ ), b ( $10^3 \text{g}^2 / \text{cm}^3 \text{ mol}^2$ ).

SI, table 2.7. The constant of (a)  $\phi_m$  vs T/K (b)  $\phi_m$  v/s molality of aq-NaCl (SI, Fig.2.7).

| Fig. (a) $\phi_m$ vs T/K |          |           |       | Fig. (b) $\phi_m$ v/s m |           |       |
|--------------------------|----------|-----------|-------|-------------------------|-----------|-------|
| Sr.no.                   | Molality | Intercept | Slope | T(K)                    | Intercept | Slope |
| 1                        | 0.2488   | - 222.56  | 1.52  | 288.15                  | -0.01     | 0.05  |
| 2                        | 0.4987   | - 117.39  | 0.80  | 298.15                  | 0.01      | 0.04  |
| 3                        | 0.7545   | - 81.44   | 0.55  | 308.15                  | -0.66     | 0.97  |
| 4                        | 1.0111   | - 65.58   | 0.45  |                         |           |       |
| 5                        | 1.2677   | - 55.72   | 0.38  |                         |           |       |
| 6                        | 1.5328   | - 47.19   | 0.32  |                         |           |       |

Units: Intercepts ( $\text{cm}^3/\text{mol}$ ), slope: a ( $\text{cm}^3/\text{mol K}$ ), b ( $10^3 \text{g cm}^3/\text{mol}^2$ ).

SI, table 2.8. The constant of (a)  $K_{S\phi m}$  vs T/K (b)  $K_{S\phi m}$  vs molality of aq-NaCl (SI, Fig.2.8).

| Fig. (a) $K_{S\phi m}$ vs T/K |          |                         |                     | Fig. (b) $K_{S\phi m}$ vs m |                         |                     |
|-------------------------------|----------|-------------------------|---------------------|-----------------------------|-------------------------|---------------------|
| Sr.no.                        | Molality | Intercept ( $10^{-6}$ ) | Slope ( $10^{-8}$ ) | T(K)                        | Intercept ( $10^{-6}$ ) | Slope ( $10^{-6}$ ) |
| 1                             | 0.2488   | 20.30                   | - 11.80             | 288.15                      | 2.53                    | - 3.66              |
| 2                             | 0.4987   | 6.17                    | - 3.33              | 298.15                      | 2.42                    | - 3.48              |
| 3                             | 0.7545   | 5.20                    | - 2.98              | 308.15                      | 2.35                    | - 3.39              |
| 4                             | 1.0111   | 2.99                    | - 1.64              |                             |                         |                     |
| 5                             | 1.2677   | 1.88                    | - 0.99              |                             |                         |                     |
| 6                             | 1.5328   | 1.41                    | - 0.73              |                             |                         |                     |

Units: Intercepts ( $10^{-1}$  cm  $s^2$ /mol), slope: a ( $10^{-1}$  cm  $s^2$ /mol K), b ( $10^2$  g cm  $s^2$ /mol $^2$ ).

SI, table 2.9. The constant of (a)  $R_m$  vs T/K (b)  $R_m$  vs molality of aq-NaCl (SI, Fig.2.9).

| Fig. (a) $R_m$ vs T/K |          |            |       | Fig. (b) $R_m$ vs m |           |        |
|-----------------------|----------|------------|-------|---------------------|-----------|--------|
| Sr.no.                | Molality | Intercept  | Slope | T(K)                | Intercept | Slope  |
| 1                     | 0.2488   | - 3,878.08 | 26.36 | 288.15              | 0.2569    | 3.1098 |
| 2                     | 0.4987   | - 3,168.89 | 21.58 | 298.15              | 1.8238    | 0.9896 |
| 3                     | 0.7545   | - 2,851.94 | 19.43 | 308.15              | - 6.8117  | 5.1878 |
| 4                     | 1.0111   | - 2,699.36 | 18.40 |                     |           |        |
| 5                     | 1.2677   | - 2,590.00 | 17.64 |                     |           |        |
| 6                     | 1.5328   | - 2,439.94 | 16.63 |                     |           |        |

Units: Intercepts (nm/mol), slope: a (nm/K), b ( $10^3$  nm g/mol).

SI, table 3.0 The constant of (a)  $\mu_m$  vs T/K (b)  $\mu_m$  vs molality of aq-NaCl (SI, Fig.3.0).

| Fig. (a) $\mu_m$ vs T/K |          |                      |                  | Fig. (b) $\mu_m$ vs m |                      |                  |
|-------------------------|----------|----------------------|------------------|-----------------------|----------------------|------------------|
| Sr.no.                  | Molality | Intercept ( $10^3$ ) | Slope ( $10^1$ ) | T(K)                  | Intercept ( $10^3$ ) | Slope ( $10^4$ ) |
| 1                       | 0.2488   | - 11.30              | 10.70            | 288.15                | 8.18                 | - 1.15           |
| 2                       | 0.4987   | - 5.01               | 4.93             | 298.15                | 8.34                 | - 1.17           |
| 3                       | 0.7545   | - 5.83               | 4.98             | 308.15                | 8.46                 | - 1.19           |
| 4                       | 1.0111   | - 3.00               | 2.83             |                       |                      |                  |
| 5                       | 1.2677   | - 1.61               | 1.75             |                       |                      |                  |
| 6                       | 1.5328   | - 1.16               | 1.34             |                       |                      |                  |

Units: Intercepts ( $10^2$ cm /s mol, slope: a ( $10^2$ cm/s mol K), b ( $10^5$  g cm/ s mol $^2$ ).

SI, table 3.1. The constant (a) viscosity vs T/K (b) viscosity vs conc. of aq-GO (Fig. 2.6).

| Fig. (a) $\eta$ vs T/K |            |           |       | Fig. (b) $\eta$ vs conc. |           |       |
|------------------------|------------|-----------|-------|--------------------------|-----------|-------|
| Sr.no.                 | Conc. (g%) | Intercept | Slope | T(K)                     | Intercept | Slope |

|   |       |         |         |        |        |         |
|---|-------|---------|---------|--------|--------|---------|
| 1 | 0.002 | 51.0982 | -0.3157 | 288.15 | 1.1303 | 6.7220  |
| 2 | 0.004 | 51.3502 | -0.3172 | 298.15 | 0.8789 | 3.2459  |
| 3 | 0.006 | 48.7570 | -0.2996 | 308.15 | 0.7242 | -0.2495 |
| 4 | 0.008 | 53.0288 | -0.3273 |        |        |         |
| 5 | 0.010 | 60.2932 | -0.3760 |        |        |         |
| 6 | 0.012 | 54.5243 | -0.3377 |        |        |         |

Units: Intercepts (mPa.S), slope: a (mPa.S/K), b (m Pa.S.cm<sup>3</sup>/g).

SI, table 3.2. The constant of (a)  $\rho_m$  vs T/K (b)  $\rho_m$  vs molality of aq-GO (Fig. 3.0)

| Fig. (a) $\rho_m$ vs T/K |                        |                      |                  | Fig. (b) $\rho_m$ vs m |                      |                    |
|--------------------------|------------------------|----------------------|------------------|------------------------|----------------------|--------------------|
| Sr.no.                   | Molality ( $10^{-7}$ ) | Intercept ( $10^5$ ) | Slope ( $10^3$ ) | T(K)                   | Intercept ( $10^6$ ) | Slope( $10^{12}$ ) |
| 1                        | 4.17                   | 15.475390            | 6.280868         | 288.15                 | 3.334620             | -2.863902          |
| 2                        | 8.33                   | 7.782514             | 3.107829         | 298.15                 | 3.327813             | -2.858055          |
| 3                        | 12.5                   | 5.156558             | 2.092981         | 308.15                 | 3.317799             | -2.849449          |
| 4                        | 16.7                   | 3.877371             | 1.562660         |                        |                      |                    |
| 5                        | 20.8                   | 3.087397             | 1.259931         |                        |                      |                    |
| 6                        | 25.0                   | 2.586741             | 1.042485         |                        |                      |                    |

Units: Intercepts (g/cm<sup>3</sup> mol), slope: a (g/cm<sup>3</sup> mol K), b ( $10^3$ g<sup>2</sup>/cm<sup>3</sup> mol<sup>2</sup>).

SI, table 3.3 The constant of (a)  $\sigma_m$  vs T/K (b)  $\sigma_m$  vs molality of aq-GO (SI, Fig.3.3).

| Fig. (a) $\sigma_m$ vs T/K |                        |                      |                  | Fig. (b) $\sigma_m$ vs m |                      |                    |
|----------------------------|------------------------|----------------------|------------------|--------------------------|----------------------|--------------------|
| Sr.no.                     | Molality ( $10^{-7}$ ) | Intercept ( $10^5$ ) | Slope ( $10^3$ ) | T(K)                     | Intercept ( $10^4$ ) | Slope( $10^{10}$ ) |
| 1                          | 4.17                   | 8.77                 | - 5.09           | 288.15                   | 4.99                 | - 4.26             |
| 2                          | 8.33                   | 9.76                 | - 6.15           | 298.15                   | 4.06                 | - 3.52             |
| 3                          | 12.5                   | 3.84                 | - 2.31           | 308.15                   | 3.33                 | - 2.86             |
| 4                          | 16.7                   | 5.91                 | - 3.76           |                          |                      |                    |
| 5                          | 20.8                   | 6.28                 | - 4.05           |                          |                      |                    |
| 6                          | 25.0                   | 4.94                 | - 3.18           |                          |                      |                    |

Units: Intercepts (s/cm mol), slope: a (s /cm mol K), b ( $10^3$  g s /cm mol<sup>2</sup>).

SI, table 3.4. The constant of (a)  $\gamma$  vs T/K (b)  $\gamma$  vs molality of aq-GO.

| Fig. (a) $\gamma$ vs T/K |                        |                     |                  | Fig. (b) $\gamma$ vs m |                      |                     |
|--------------------------|------------------------|---------------------|------------------|------------------------|----------------------|---------------------|
| Sr.no.                   | Molality ( $10^{-7}$ ) | Intercept( $10^9$ ) | Slope ( $10^6$ ) | T(K)                   | Intercept ( $10^8$ ) | Slope ( $10^{14}$ ) |
| 1                        | 4.17                   | 4.03                | -25.4            | 288.15                 | 2.55                 | -2.19               |
| 2                        | 8.33                   | -1.30               | 9.58             | 298.15                 | 2.42                 | -2.05               |
| 3                        | 12.5                   | 0.63                | -3.66            | 308.15                 | 2.42                 | -2.08               |
| 4                        | 16.7                   | -1.24               | 8.72             |                        |                      |                     |
| 5                        | 20.8                   | -1.72               | 11.90            |                        |                      |                     |



|   |      |       |      |  |  |  |
|---|------|-------|------|--|--|--|
| 6 | 25.0 | -1.43 | 9.90 |  |  |  |
|---|------|-------|------|--|--|--|

Units: Intercepts (m N/m mol), slope: a (m N/m mol K), b ( $10^3$  g m N/ m mol<sup>2</sup>).

SI, table 3.5. The constant of (a)  $\eta_{sp/m}$  vs T/K (b)  $\eta_{sp/m}$  vs molality of aq-GO.

| Fig. (a) $\eta_{sp/m}$ vs T/K |                        |                     |                  | Fig. (b) $\eta_{sp/m}$ vs m |                      |                    |
|-------------------------------|------------------------|---------------------|------------------|-----------------------------|----------------------|--------------------|
| Sr.no.                        | Molality ( $10^{-7}$ ) | Intercept( $10^6$ ) | Slope ( $10^4$ ) | T(K)                        | Intercept ( $10^4$ ) | Slope( $10^{10}$ ) |
| 1                             | 4.17                   | 26.711              | - 17.9130        | 288.15                      | 1.4343               | 0. 3359            |
| 2                             | 8.33                   | 13.237              | - 8.8640         | 298.15                      | -2.5811              | 3.4506             |
| 3                             | 12.5                   | 6.2216              | - 4.1515         | 308.15                      | 1.9181               | -1.2742            |
| 4                             | 16.7                   | 6.3050              | - 4.1603         |                             |                      |                    |
| 5                             | 20.8                   | 8.8710              | - 5.9019         |                             |                      |                    |
| 6                             | 25.0                   | 5.2575              | - 3.5047         |                             |                      |                    |

Units: Intercepts ( $10^3$  g/ mol), slope: a ( $10^3$  g /mol K), b ( $10^6$  g<sup>2</sup> /mol<sup>2</sup>).

SI, table 3.6. The constant of (a)  $\eta_m$  vs T/K (b)  $\eta_m$  vs molality of aq-GO (Fig. 2.6).

| Fig. (a) $\eta_m$ vs T/K |                        |                      |                  | Fig. (b) $\eta_m$ vs m |                      |                    |
|--------------------------|------------------------|----------------------|------------------|------------------------|----------------------|--------------------|
| Sr.no.                   | Molality ( $10^{-7}$ ) | Intercept ( $10^7$ ) | Slope ( $10^5$ ) | T(K)                   | Intercept ( $10^6$ ) | Slope( $10^{12}$ ) |
| 1                        | 4.17                   | 12.2670              | - 7.5797         | 288.15                 | 3.8129               | - 3.2569           |
| 2                        | 8.33                   | 6.1624               | - 3.8067         | 298.15                 | 2.9489               | - 2.5216           |
| 3                        | 12.5                   | 3.9004               | - 2.3969         | 308.15                 | 2.4139               | - 2.0705           |
| 4                        | 16.7                   | 3.1814               | - 1.9638         |                        |                      |                    |
| 5                        | 20.8                   | 2.8937               | - 1.8044         |                        |                      |                    |
| 6                        | 25.0                   | 2.1823               | - 1.3518         |                        |                      |                    |

Units: Intercepts (mPa.S/ mol), slope: a (m Pa. S/mol K), b ( $10^3$  g m Pa. S /mol<sup>2</sup>).

SI, table 3.7. The constant of (a)  $\eta_{sp/m}$  vs T/K (b)  $\eta_{sp/m}$  vs molality of aq-NaCl.

| Fig. (a) $\eta_{sp/m}$ vs T/K |          |            |        | Fig. (b) $\eta_{sp/m}$ vs m |           |        |
|-------------------------------|----------|------------|--------|-----------------------------|-----------|--------|
| Sr.no.                        | Molality | Intercept  | Slope  | T(K)                        | Intercept | Slope  |
| 1                             | 0.2488   | - 556.3950 | 3.7924 | 288.15                      | - 0.0210  | 0.1165 |
| 2                             | 0.4987   | - 293.4847 | 1.9988 | 298.15                      | 0.0331    | 0.0907 |
| 3                             | 0.7545   | - 203.6030 | 1.3861 | 308.15                      | - 1.6570  | 2.4191 |
| 4                             | 1.0111   | - 163.9443 | 1.1154 |                             |           |        |
| 5                             | 1.2677   | - 139.2984 | 0.9467 |                             |           |        |
| 6                             | 1.5328   | - 117.9688 | 0.8016 |                             |           |        |

Units: Intercepts ( $10^3$  g/ mol), slope: a ( $10^3$  g /mol K), b ( $10^6$  g<sup>2</sup> /mol<sup>2</sup>).

SI, table 3.8. The constant of (a)  $\gamma_m$  vs T/K (b)  $\gamma_m$  vs molality for aq-NaCl (SI figs.3.4).

| Fig. (a) $\gamma_m$ vs T/K |          |           |        | Fig. (b) $\gamma_m$ vs m |           |         |
|----------------------------|----------|-----------|--------|--------------------------|-----------|---------|
| Sr.no.                     | Molality | Intercept | Slope  | T(K)                     | Intercept | Slope   |
| 1                          | 0.2488   | 4208.69   | -26.18 | 288.15                   | 404.50    | -568.17 |
| 2                          | 0.4987   | 1238.75   | -7.17  | 298.15                   | 396.76    | -556.94 |
| 3                          | 0.7545   | 536.51    | -2.81  | 308.15                   | 401.68    | -568.68 |
| 4                          | 1.0111   | 601.62    | -3.52  |                          |           |         |
| 5                          | 1.2677   | 1401.38   | -9.01  |                          |           |         |
| 6                          | 1.5328   | 1004.86   | -6.43  |                          |           |         |

Units: Intercepts (m N/m mol), slope: a (m N/m mol K), b ( $10^3$  g m N/ m mol<sup>2</sup>).

SI, table 3.9. The constant of (a)  $\sigma_m$  vs T/K (b)  $\sigma_m$  vs molality for aq-NaCl (SI, Fig.3.9).

| Fig. (a) $\sigma_m$ vs T/K |          |                         |                     | Fig. (b) $\sigma_m$ vs m |           |        |
|----------------------------|----------|-------------------------|---------------------|--------------------------|-----------|--------|
| Sr.no.                     | Molality | Intercept ( $10^{-1}$ ) | Slope ( $10^{-3}$ ) | T(K)                     | Intercept | Slope  |
| 1                          | 0.2488   | 5.31                    | -2.04               | 288.15                   | 0.09      | - 0.12 |
| 2                          | 0.4987   | 2.37                    | -0.85               | 298.15                   | 0.07      | - 0.10 |
| 3                          | 0.7545   | 1.29                    | -0.37               | 308.15                   | 0.05      | - 0.07 |
| 4                          | 1.0111   | -0.17                   | 0.50                |                          |           |        |
| 5                          | 1.2677   | -2.57                   | 2.03                |                          |           |        |
| 6                          | 1.5328   | -1.78                   | 1.45                |                          |           |        |

Units: Intercepts (s/cm mol), slope: a (s/cm mol K), b ( $10^3$  g s /cm mol<sup>2</sup>).

SI, table 4.0. The constant of (a)  $\eta_m$  vs T/K (b)  $\eta_m$  vs molality for aq-NaCl (SI, Fig.4.0).

| Fig. (a) $\eta_m$ vs T/K |          |           |         | Fig. (b) $\eta_m$ vs m |           |         |
|--------------------------|----------|-----------|---------|------------------------|-----------|---------|
| Sr.no.                   | Molality | Intercept | Slope   | T(K)                   | Intercept | Slope   |
| 1                        | 0.2488   | 90.8001   | -0.4966 | 288.15                 | 6.2634    | -8.7453 |
| 2                        | 0.4987   | 35.3858   | -0.1810 | 298.15                 | 4.9512    | -6.8688 |
| 3                        | 0.7545   | 18.6949   | -0.0875 | 308.15                 | 3.8473    | -5.3535 |
| 4                        | 1.0111   | 6.5160    | -0.0149 |                        |           |         |
| 5                        | 1.2677   | -0.5214   | 0.0263  |                        |           |         |
| 6                        | 1.5328   | -0.2962   | 0.0212  |                        |           |         |

Units: Intercepts (mPa.S/ mol), slope: a (m Pa. S/mol K), b ( $10^3$  g m Pa. S /mol<sup>2</sup>).

SI, table-4.1 PVP at 298.15K.

| Conc.(g/100ml) | M wt = 29K                    |                  | M wt = 40K                    |                  | M wt = 55K                    |                  | [ $\eta$ ], (100ml/g) |
|----------------|-------------------------------|------------------|-------------------------------|------------------|-------------------------------|------------------|-----------------------|
|                | $\rho$ , (g/cm <sup>3</sup> ) | $\eta$ , (mPa.S) | $\rho$ , (g/cm <sup>3</sup> ) | $\eta$ , (mPa.S) | $\rho$ , (g/cm <sup>3</sup> ) | $\eta$ , (mPa.S) |                       |
| 0.005          | 0.999099                      | 1.1421           | 0.999089                      | 1.1478           | 0.999089                      | 1.1543           | 0.9212                |
| 0.010          | 0.999106                      | 1.1449           | 0.999099                      | 1.1505           | 0.999097                      | 1.1624           | 2.8275                |
| 0.015          | 0.999109                      | 1.1473           | 0.999105                      | 1.1367           | 0.999106                      | 1.1636           | 3.6502                |

SI, table 4.2, PVP at 298.15K.

| Conc.(g/100ml) | M wt = 29K                    |                  | M wt = 40K                    |                  | M wt = 55K                    |                  | [ $\eta$ ], (100ml/g) |
|----------------|-------------------------------|------------------|-------------------------------|------------------|-------------------------------|------------------|-----------------------|
|                | $\rho$ , (g/cm <sup>3</sup> ) | $\eta$ , (mPa.S) | $\rho$ , (g/cm <sup>3</sup> ) | $\eta$ , (mPa.S) | $\rho$ , (g/cm <sup>3</sup> ) | $\eta$ , (mPa.S) |                       |
| 0.005          | 0.997062                      | 0.8435           | 0.997051                      | 0.8700           | 0.997052                      | 0.8753           | -13.6397              |
| 0.010          | 0.997069                      | 0.8465           | 0.997062                      | 0.8635           | 0.997058                      | 0.8787           | -6.6166               |
| 0.015          | 0.997076                      | 0.8494           | 0.997069                      | 0.8801           | 0.997067                      | 0.8818           | -4.5205               |

SI, table 4.3, PVP at 308.15K.

| Conc.(g/100ml) | M wt = 29K                    |                  | M wt = 40K                    |                  | M wt = 55K                    |                  | [ $\eta$ ], (100ml/g) |
|----------------|-------------------------------|------------------|-------------------------------|------------------|-------------------------------|------------------|-----------------------|
|                | $\rho$ , (g/cm <sup>3</sup> ) | $\eta$ , (mPa.S) | $\rho$ , (g/cm <sup>3</sup> ) | $\eta$ , (mPa.S) | $\rho$ , (g/cm <sup>3</sup> ) | $\eta$ , (mPa.S) |                       |
| 0.005          | 0.994064                      | 0.7278           | 0.994052                      | 0.7294           | 0.994089                      | 0.7337           | 2.9711                |
| 0.010          | 0.994067                      | 0.7350           | 0.993916                      | 0.7300           | 0.994070                      | 0.7357           | 3.5292                |
| 0.015          | 0.994075                      | 0.7352           | 0.994033                      | 0.7321           | 0.994017                      | 0.7366           | 5.1094                |

SI, table:4.4 Primary data in terms of conc. of aq-GO.

| Conc. (g%) | 288.15K |        | 298.15K |        | 308.15K |        |
|------------|---------|--------|---------|--------|---------|--------|
|            | VFT     | PDN    | VFT     | PDN    | VFT     | PDN    |
| 0.002      | 270.68  | 132.00 | 214.24  | 146.00 | 177.38  | 139.00 |
| 0.004      | 272.22  | 132.00 | 215.35  | 140.00 | 178.13  | 139.00 |
| 0.006      | 273.25  | 132.00 | 216.76  | 144.00 | 178.45  | 139.00 |
| 0.008      | 277.15  | 132.00 | 217.44  | 138.00 | 177.99  | 139.00 |
| 0.010      | 279.73  | 132.00 | 217.88  | 135.00 | 180.20  | 139.00 |
| 0.012      | 277.78  | 132.00 | 218.63  | 135.00 | 180.64  | 139.00 |

Symbol: Conc.= concentration (g%, w/v), VFT= viscous flow time, PDN= pendant drop no.

SI, table:4.5 Primary data in terms of conc. of aq-GO.

| 288.15K  |         | 298.15K  |         | 308.15K  |         |
|----------|---------|----------|---------|----------|---------|
| $\rho$   | $\mu$   | $\rho$   | $\mu$   | $\rho$   | $\mu$   |
| 0.999087 | 1466.53 | 0.997048 | 1496.82 | 0.994047 | 1519.76 |
| 0.999096 | 1466.55 | 0.997056 | 1496.93 | 0.994063 | 1519.71 |
| 0.999100 | 1466.67 | 0.997062 | 1496.79 | 0.994062 | 1519.77 |
| 0.999111 | 1466.55 | 0.997074 | 1496.95 | 0.994079 | 1519.75 |

|          |         |          |         |          |         |
|----------|---------|----------|---------|----------|---------|
| 0.999120 | 1466.67 | 0.997083 | 1496.77 | 0.994081 | 1519.76 |
| 0.999126 | 1466.77 | 0.997089 | 1496.95 | 0.994094 | 1519.77 |

Symbol:  $\rho$  = Density ( $\text{g/cm}^3$ ),  $\mu$  = Sound velocity (m/s).

SI, table:4.6 Primary data NaCl.

| Molality | 288.15K |     | 298.15K |     | 308.15K |     |
|----------|---------|-----|---------|-----|---------|-----|
|          | VFT     | PDN | VFT     | PDN | VFT     | PDN |
| 0.2488   | 279.96  | 132 | 217.35  | 136 | 182.51  | 138 |
| 0.4987   | 278.69  | 133 | 220.16  | 136 | 184.63  | 140 |
| 0.7545   | 281.25  | 134 | 223.52  | 137 | 186.97  | 142 |
| 1.0111   | 284.44  | 135 | 228.36  | 137 | 189.54  | 140 |
| 1.2677   | 285.10  | 136 | 232.32  | 140 | 193.31  | 140 |
| 1.5328   | 289.22  | 137 | 236.21  | 140 | 197.44  | 140 |

SI, table:4.7 Primary data NaCl.

| 288.15K  |         | 298.15K  |         | 308.15K  |         |
|----------|---------|----------|---------|----------|---------|
| $\rho$   | $\mu$   | $\rho$   | $\mu$   | $\rho$   | $\mu$   |
| 1.002144 | 1483.61 | 1.007658 | 1513.06 | 1.004117 | 1534.46 |
| 1.019878 | 1500.08 | 1.017422 | 1528.00 | 1.013823 | 1548.48 |
| 1.029851 | 1516.21 | 1.027188 | 1545.23 | 1.023490 | 1562.43 |
| 1.040184 | 1533.03 | 1.037212 | 1559.39 | 1.033440 | 1576.90 |
| 1.049988 | 1549.00 | 1.046759 | 1573.12 | 1.042884 | 1590.51 |
| 1.059989 | 1565.30 | 1.056628 | 1588.05 | 1.052584 | 1604.55 |

SI, table 4.8. Molal radius at 3T of aq-GO.

| Molality ( $10^{-6}$ ) | Radius (nm) 288.15K | Radius (nm) 298.15K | Radius (nm) 308.15K |
|------------------------|---------------------|---------------------|---------------------|
| 0.41654                | 139.06              | -132.12             | 130.40              |
| 0.83329                | 134.60              | -55.54              | 124.39              |
| 1.25003                | 128.31              | 89.31               | 114.74              |
| 1.66682                | 143.69              | 94.30               | 96.12               |
| 2.08360                | 145.85              | 93.86               | 118.54              |
| 2.49852                | 128.61              | 96.93               | 115.69              |

Units: (nm/mol).

SI, table 4.9. Molal radius at 3T of aq-NaCl.

| Molality | Radius (nm) 288.15K | Radius (nm) 298.15K | Radius (nm) 308.15K |
|----------|---------------------|---------------------|---------------------|
| 0.2488   | 0.8535              | 2.0345              | -5.7353             |
| 0.4987   | 1.6476              | 2.2589              | -4.4697             |

|        |        |        |         |
|--------|--------|--------|---------|
| 0.7545 | 1.9145 | 2.3553 | -3.8180 |
| 1.0111 | 2.0583 | 2.4670 | -3.3857 |
| 1.2677 | 2.0417 | 2.5006 | -3.0439 |
| 1.5328 | 2.1328 | 2.5197 | -2.7525 |

Units: (nm/mol).

SI, table 5.0. parameters of aq-GO.

| T(K)   | $M_v$    | Surface Area ( $10^3$ ) | $E_a(10^{-3})$ | $\Delta G(10^{-5})$ | $\Delta H(10^3)$ | $\Delta S$ |
|--------|----------|-------------------------|----------------|---------------------|------------------|------------|
| 288.15 | 46886.03 | -219.81075              | 1.914714       | -5.487077           | -5.517247        | -19.147135 |
| 298.15 | 48134.19 | -0.14860                | 1.151758       | 3.868957            | -5.708719        | -19.147138 |
| 308.15 | 42845.25 | -287.81426              | 1.219807       | 11.660280           | -5.900191        | -19.147138 |

SI, table 5.1: The parameters related to  $\Phi$  for reduction of f-GO-TMIs.

| $TMI_s - GO$   | $\lambda_{abs}$<br>(nm) | $\lambda_{em}$<br>(nm) | $E_{abs}$<br>( $10^{-19}$ ) J | $E_{em}$<br>( $10^{-19}$ ) J | $n_a$<br>( $10^{15}$ ) s $^{-1}$ | $n_e$<br>( $10^{15}$ ) s $^{-1}$ | $\Phi_{QA}$<br>(%) |
|----------------|-------------------------|------------------------|-------------------------------|------------------------------|----------------------------------|----------------------------------|--------------------|
| <i>Cr - GO</i> | 223                     | 212                    | 8.9139                        | 9.3764                       | 1.3465                           | 1.4151                           | 105.09             |
| <i>Mn - GO</i> | 200                     | 200                    | 9.9390                        | 9.939                        | 1.5000                           | 1.5000                           | 100                |
| <i>Fe - GO</i> | 220                     | 201                    | 9.0354                        | 9.8895                       | 1.3636                           | 1.4925                           | 109.43             |
| <i>Ni - GO</i> | 200                     | 200                    | 9.939                         | 9.939                        | 1.5000                           | 1.5000                           | 100                |

Abs wavelength ( $\lambda_{abs}$ ), em wavelength ( $\lambda_{em}$ ), abs energy ( $E_{abs}$ ), em energy ( $E_{em}$ ), number of abs photons ( $n_a$ ), number of em photons ( $n_e$ ) and quantum yield ( $\Phi$ ).

SI, table 5.2. Primary data of aq-GO.

| 288.15K |          | 298.15K |          | 308.15K |          |
|---------|----------|---------|----------|---------|----------|
| $\eta$  | $\gamma$ | $\eta$  | $\gamma$ | $\eta$  | $\gamma$ |
| 1.1455  | 76.38841 | 0.8850  | 72.69481 | 0.7233  | 72.48799 |
| 1.1521  | 76.38910 | 0.896   | 75.81091 | 0.7264  | 72.48916 |
| 1.1564  | 76.38941 | 0.8954  | 73.70550 | 0.7277  | 72.48908 |
| 1.1730  | 76.39025 | 0.8982  | 76.91101 | 0.7258  | 72.49032 |
| 1.1839  | 76.39094 | 0.9001  | 78.62085 | 0.7348  | 72.49047 |
| 1.1756  | 76.39140 | 0.9032  | 78.62133 | 0.7366  | 72.49142 |

Viscosity = ( $\eta$ , mPa.S), Surface tension = ( $\gamma$ , m N/m).

SI, table 5.3. Molal parameter of NaCl at 288.15K.

| Molality | $\eta_m$ | $\gamma_m$ | $\sigma_m(10^{-2})$ | $\rho_m$ | $\phi_m(10^{-2})$ | $KS\phi_m(10^{-7})$ | $V_{\phi m}$ | $\mu_m$ |
|----------|----------|------------|---------------------|----------|-------------------|---------------------|--------------|---------|
| 0.2488   | 4.5773   | 294.54     | 6.2474              | 4.028703 | 15.6810           | 18.220              | 57.5505      | 5964.24 |
| 0.4987   | 2.3128   | 148.38     | 3.1253              | 2.044913 | 1.1282            | 8.737               | 46.7123      | 3007.75 |

|        |        |       |        |          |        |       |          |         |
|--------|--------|-------|--------|----------|--------|-------|----------|---------|
| 0.7545 | 1.5580 | 98.30 | 2.1006 | 1.364969 | 1.7702 | 5.598 | 32.8147  | 2009.59 |
| 1.0111 | 1.1876 | 73.54 | 1.5972 | 1.028813 | 2.1996 | 4.045 | 12.9143  | 1516.27 |
| 1.2677 | 0.9584 | 58.78 | 1.2863 | 0.828295 | 2.1469 | 3.131 | -12.1640 | 1221.95 |
| 1.5328 | 0.8117 | 48.71 | 1.0871 | 0.691536 | 2.4471 | 2.512 | -43.9207 | 1021.20 |

Symbol:  $\eta_m$  = molar viscosity (mPa.S/mol),  $\gamma_m$  = molar surface tension (mNm<sup>-1</sup>/mol),  $\rho_m$  = molar density (g cm<sup>-3</sup>/mol),  $\phi_m$  = molar fractional volume (cm<sup>3</sup>/mol)  $KS_{\phi m}$  = molar isentropic compressibility (10<sup>-1</sup>cms<sup>2</sup>/mol),  $\mu_m$  = molar sound velocity (ms<sup>-1</sup>/mol),  $V_{\phi m}$  = Apparent molar volume (cm<sup>3</sup>/mol),  $\sigma_m$  = molar friccohesity (s.cm<sup>-1</sup>/mol).

SI, table 5.4. Molal parameter of NaCl at 298.15K.

| Molality | $\eta_m$ | $\gamma_m$ | $\sigma_m(10^{-2})$ | $\rho_m$ | $\phi_m(10^{-2})$ | $KS_{\phi m}(10^{-7})$ | $V_{\phi m}$ | $\mu_m$ |
|----------|----------|------------|---------------------|----------|-------------------|------------------------|--------------|---------|
| 0.2488   | 3.6269   | 289.03     | 5.0446              | 4.0509   | 2.1241            | 17.426                 | 15.5254      | 6082.63 |
| 0.4987   | 1.8501   | 145.55     | 2.5486              | 2.0400   | 2.9076            | 8.441                  | 17.1608      | 3063.73 |
| 0.7545   | 1.2536   | 96.43      | 1.7230              | 1.3614   | 3.2958            | 5.404                  | 17.8824      | 2048.05 |
| 1.0111   | 0.9650   | 72.66      | 1.3136              | 1.0259   | 3.7874            | 3.921                  | 17.9263      | 1542.34 |
| 1.2677   | 0.7902   | 57.23      | 1.0892              | 0.8257   | 3.9441            | 3.045                  | 18.2520      | 1240.97 |
| 1.5328   | 0.6708   | 47.78      | 0.9159              | 0.6893   | 4.0355            | 2.448                  | 18.4097      | 1036.04 |

SI, table 5.5. Molal parameter of NaCl at 308.15K.

| Molality | $\eta_m$ | $\gamma_m$ | $\sigma_m(10^{-2})$ | $\rho_m$ | $\phi_m(10^{-2})$ | $KS_{\phi m}(10^{-7})$ | $V_{\phi m}$ | $\mu_m$ |
|----------|----------|------------|---------------------|----------|-------------------|------------------------|--------------|---------|
| 0.2488   | 2.8135   | 292.26     | 3.8701              | 4.036635 | -47.588           | 17.004                 | 17.6305      | 6168.65 |
| 0.4987   | 1.4333   | 145.07     | 1.9810              | 2.032773 | -22.525           | 8.248                  | 18.2915      | 3104.79 |
| 0.7545   | 0.9686   | 95.45      | 1.3450              | 1.356538 | -14.040           | 5.305                  | 18.7382      | 2070.85 |
| 1.0111   | 0.7399   | 72.95      | 1.0032              | 1.022142 | -9.790            | 3.848                  | 18.6186      | 1559.66 |
| 1.2677   | 0.6074   | 58.71      | 0.8161              | 0.822691 | -7.114            | 2.990                  | 18.8719      | 1254.69 |
| 1.5328   | 0.5178   | 49.00      | 0.6893              | 0.686705 | -5.260            | 2.407                  | 19.0196      | 1046.81 |

SI, table 5.6. Hydrodynamic volumes.

| T(K)   | $HDV(\% w/v)_{GO} (10^5)$ | $HDV(molal)_{GO} (10^8)$ | $HDV(molal)_{NaCl}$ |
|--------|---------------------------|--------------------------|---------------------|
| 288.15 | 1.4386                    | 6.9039                   | -1.2272             |
| 298.15 | -2.5888                   | -12.4239                 | 1.9344              |
| 308.15 | 1.9239                    | 9.2326                   | -96.8351            |

Units: cm<sup>3</sup>(%w/v) and cm<sup>3</sup>/mol (molal).

SI, table 5.7. Number of H<sub>2</sub>O in aq-GO and aq-NaCl.

| T(K)   | Aq-GO (10 <sup>8</sup> ) | Aq-NaCl |
|--------|--------------------------|---------|
| 288.15 | -6.9036                  | 63      |
| 298.15 | 12.4243                  | 12      |
| 308.15 | -9.2322                  | 114     |

SI Table5.8. The constant of (a)  $\eta_{sp}/c$  vs T (b)  $\eta_{sp}/c$  vs conc. for aq-GO of SI Fig 3.9.

| Fig. (a) $\eta_{sp}/c$ vs T |            |                      |          | Fig. (b) $\eta_{sp}/c$ vs conc. |           |                  |
|-----------------------------|------------|----------------------|----------|---------------------------------|-----------|------------------|
| Sr.no.                      | Conc. (g%) | Intercept ( $10^3$ ) | Slope    | T(K)                            | Intercept | Slope ( $10^2$ ) |
| 1                           | 0.002      | 5.5658               | -37.3250 | 288.15                          | 2.9887    | 1.4584           |
| 2                           | 0.004      | 2.7583               | -18.4700 | 298.15                          | -5.3784   | 14.9830          |
| 3                           | 0.006      | 1.2964               | -8.6506  | 308.15                          | 3.9969    | -5.5328          |
| 4                           | 0.008      | 1.3138               | -8.6693  |                                 |           |                  |
| 5                           | 0.010      | 1.8485               | -12.2980 |                                 |           |                  |
| 6                           | 0.012      | 1.0956               | -7.3031  |                                 |           |                  |

Units: Intercepts (ml/g), slope: a ( $\text{cm}^3/\text{g K}$ ), b ( $\text{cm}^6/\text{g}^2$ ).

SI, table 5.9. ICP-OES analysis for TMs-GO.

| ID: Calib Blank     |                     | Seq. No.: 1                  |                                 |                          | A/S Pos:     |     |
|---------------------|---------------------|------------------------------|---------------------------------|--------------------------|--------------|-----|
| Sample Qty Analyte: | Corr. Intensity (g) | Prep. Volume Conc., (Calib.) | Dilution: Std. Dev. Calib Units | Conc. (Sample) Std. Dev. | Sample Units | RSD |
| As 188.979          | 2.3                 | [0.00]                       | mg/L                            |                          |              | %   |
| Be 313.107          | -53.8               | [0.00]                       | mg/L                            |                          |              | %   |
| Ca 317.933          | 4133.6              | [0.00]                       | mg/L                            |                          |              | %   |
| Cd 228.802          | 17.7                | [0.00]                       | mg/L                            |                          |              | %   |
| Co 228.616          | -2.2                | [0.00]                       | mg/L                            |                          |              | %   |
| Cr 267.716          | 38.4                | [0.00]                       | mg/L                            |                          |              | %   |
| Cu 327.393          | -30.2               | [0.00]                       | mg/L                            |                          |              | %   |
| Fe 238.204          | 125.7               | [0.00]                       | mg/L                            |                          |              | %   |
| Li 670.784          | 22.7                | [0.00]                       | mg/L                            |                          |              | %   |
| Mg 285.213          | 3554.1              | [0.00]                       | mg/L                            |                          |              | %   |
| Mn 257.610          | 38.6                | [0.00]                       | mg/L                            |                          |              | %   |
| Mo 202.031          | 0.8                 | [0.00]                       | mg/L                            |                          |              | %   |
| Ni 231.604          | 5.4                 | [0.00]                       | mg/L                            |                          |              | %   |
| Pb 220.353          | 0.3                 | [0.00]                       | mg/L                            |                          |              | %   |
| Sb 206.836          | -1.0                | [0.00]                       | mg/L                            |                          |              | %   |
| Se 196.026          | -3.1                | [0.00]                       | mg/L                            |                          |              | %   |
| Sr 407.771          | 6600.1              | [0.00]                       | mg/L                            |                          |              | %   |
| Ti 334.940          | -3.3                | [0.00]                       | mg/L                            |                          |              | %   |
| Tl 190.801          | -1.5                | [0.00]                       | mg/L                            |                          |              | %   |
| V 290.880           | 41.8                | [0.00]                       | mg/L                            |                          |              | %   |
| Zn 206.200          | 34.0                | [0.00]                       | mg/L                            |                          |              | %   |

| ID: Std 100 |  | Seq. No.: 2 |  |  | A/S Pos: |  |
|-------------|--|-------------|--|--|----------|--|
|             |  |             |  |  |          |  |

| Sample Qty Analyte: | Corr. Intensity (g) | Prep. Volume Conc., (Calib.) | Dilution: Std. Dev. Calib Units | Conc. (Sample) Std. Dev. | Sample Units | RSD |
|---------------------|---------------------|------------------------------|---------------------------------|--------------------------|--------------|-----|
| As 188.979          | 7879.8              | 93.52                        | mg/L                            | 93.52                    | mg/L         | %   |
| Be 313.107          | 9.4                 | 0.028                        | mg/L                            | 0.028                    | mg/L         | %   |
| Ca 317.933          | -3731.3             | -0.346                       | mg/L                            | -0.346                   | mg/L         | %   |
| Cd 228.802          | 186920.2            | 46.18                        | mg/L                            | 46.18                    | mg/L         | %   |
| Co 228.616          | 3.7                 | -0.003                       | mg/L                            | -0.003                   | mg/L         | %   |
| Cr 267.716          | -61.3               | -0.037                       | mg/L                            | -0.037                   | mg/L         | %   |
| Cu 327.393          | 35.5                | -0.021                       | mg/L                            | -0.021                   | mg/L         | %   |
| Fe 238.204          | -52.0               | -0.034                       | mg/L                            | -0.034                   | mg/L         | %   |
| Li 670.784          | 25.0                | -0.004                       | mg/L                            | -0.004                   | mg/L         | %   |
| Mg 285.213          | -3442.3             | -0.084                       | mg/L                            | -0.084                   | mg/L         | %   |
| Mn 257.610          | -21.0               | -0.004                       | mg/L                            | -0.004                   | mg/L         | %   |
| Mo 202.031          | 6.2                 | 0.009                        | mg/L                            | 0.009                    | mg/L         | %   |
| Ni 231.604          | 88.7                | 0.058                        | mg/L                            | 0.058                    | mg/L         | %   |
| Pb 220.353          | 12040.3             | 50.17                        | mg/L                            | 50.17                    | mg/L         | %   |
| Sb 206.836          | -1.5                | -0.022                       | mg/L                            | -0.022                   | mg/L         | %   |
| Se 196.026          | 4142.4              | 44.66                        | mg/L                            | 44.66                    | mg/L         | %   |
| Sr 407.771          | -6307.9             | -0.023                       | mg/L                            | -0.023                   | mg/L         | %   |
| Ti 334.940          | 189.1               | 0.018                        | mg/L                            | 0.018                    | mg/L         | %   |
| Tl 190.801          | 8353.7              | 98.75                        | mg/L                            | 98.75                    | mg/L         | %   |
| V 290.880           | -11.6               | -0.033                       | mg/L                            | -0.033                   | mg/L         | %   |
| Zn 206.200          | 3.4                 | -0.002                       | mg/L                            | -0.002                   | mg/L         | %   |

ID: Graphene Oxide

Seq. No.: 3

A/S Pos:

| Sample Qty Analyte: | Corr. Intensity (g) | Prep. Volume Conc., (Calib.) | Dilution: Std. Dev. Calib Units | Conc. (Sample) Std. Dev. | Sample Units | RSD |
|---------------------|---------------------|------------------------------|---------------------------------|--------------------------|--------------|-----|
| As 188.979          | 0.1                 | 0.009                        | mg/L                            | 0.009                    | mg/L         | %   |
| Be 313.107          | -10.9               | 0.028                        | mg/L                            | 0.028                    | mg/L         | %   |
| Ca 317.933          | 5287.3              | 1.792                        | mg/L                            | 1.792                    | mg/L         | %   |
| Cd 228.802          | -2.8                | -0.036                       | mg/L                            | -0.036                   | mg/L         | %   |
| Co 228.616          | -6.7                | -0.008                       | mg/L                            | -0.008                   | mg/L         | %   |
| Cr 267.716          | -2.7                | -0.023                       | mg/L                            | -0.023                   | mg/L         | %   |
| Cu 327.393          | 653.9               | 0.055                        | mg/L                            | 0.055                    | mg/L         | %   |
| Fe 238.204          | 580.7               | 0.093                        | mg/L                            | 0.093                    | mg/L         | %   |
| Li 670.784          | 45.1                | -0.004                       | mg/L                            | -0.004                   | mg/L         | %   |
| Mg 285.213          | 6239.3              | 0.435                        | mg/L                            | 0.435                    | mg/L         | %   |
| Mn 257.610          | 19933.4             | 0.728                        | mg/L                            | 0.728                    | mg/L         | %   |
| Mo 202.031          | -1.7                | -0.003                       | mg/L                            | -0.003                   | mg/L         | %   |
| Ni 231.604          | 234.9               | 0.176                        | mg/L                            | 0.176                    | mg/L         | %   |
| Pb 220.353          | 8.6                 | 0.061                        | mg/L                            | 0.061                    | mg/L         | %   |
| Sb 206.836          | -8.2                | -0.061                       | mg/L                            | -0.061                   | mg/L         | %   |
| Se 196.026          | 1.5                 | -0.000                       | mg/L                            | -0.000                   | mg/L         | %   |
| Sr 407.771          | 2546.8              | -0.016                       | mg/L                            | -0.016                   | mg/L         | %   |
| Ti 334.940          | -15.5               | 0.008                        | mg/L                            | 0.008                    | mg/L         | %   |
| Tl 190.801          | -0.7                | -0.038                       | mg/L                            | -0.038                   | mg/L         | %   |
| V 290.880           | 3.6                 | -0.029                       | mg/L                            | -0.029                   | mg/L         | %   |
| Zn 206.200          | 187.1               | 0.101                        | mg/L                            | 0.101                    | mg/L         | %   |

ID: Cr-GO

Seq. No.: 4

A/S Pos:



| Sample Qty Analyte: | Corr. Intensity (g) | Prep. Volume Conc., (Calib.) | Dilution: Std. Dev. Calib Units | Conc. (Sample) Std. Dev. | Sample Units | RSD      |
|---------------------|---------------------|------------------------------|---------------------------------|--------------------------|--------------|----------|
| As 188.979          | 1.0                 | 0.020                        | mg/L                            | 0.020                    | mg/L         | %        |
| Be 313.107          | -4.4                | 0.028                        | mg/L                            | 0.028                    | mg/L         | %        |
| Ca 317.933          | -184.5              | 0.495                        | mg/L                            | 0.495                    | mg/L         | %        |
| Cd 228.802          | -4.4                | -0.036                       | mg/L                            | -0.036                   | mg/L         | %        |
| Co 228.616          | 11.0                | 0.000                        | mg/L                            | 0.000                    | mg/L         | %        |
| <b>Cr 267.716</b>   | <b>6416.2</b>       | <b>1.584</b>                 | <b>mg/L</b>                     | <b>1.584</b>             | <b>mg/L</b>  | <b>%</b> |
| Cu 327.393          | 548.2               | 0.042                        | mg/L                            | 0.042                    | mg/L         | %        |
| Fe 238.204          | 100.0               | -0.003                       | mg/L                            | -0.003                   | mg/L         | %        |
| Li 670.784          | 5.6                 | -0.004                       | mg/L                            | -0.004                   | mg/L         | %        |
| Mg 285.213          | 12.9                | 0.102                        | mg/L                            | 0.102                    | mg/L         | %        |
| Mn 257.610          | 1999.6              | 0.070                        | mg/L                            | 0.070                    | mg/L         | %        |
| Mo 202.031          | -4.3                | -0.007                       | mg/L                            | -0.007                   | mg/L         | %        |
| Ni 231.604          | 29.4                | 0.010                        | mg/L                            | 0.010                    | mg/L         | %        |
| Pb 220.353          | 1.5                 | 0.032                        | mg/L                            | 0.032                    | mg/L         | %        |
| Sb 206.836          | 5.7                 | 0.021                        | mg/L                            | 0.021                    | mg/L         | %        |
| Se 196.026          | -2.4                | -0.042                       | mg/L                            | -0.042                   | mg/L         | %        |
| Sr 407.771          | -2427.9             | -0.020                       | mg/L                            | -0.020                   | mg/L         | %        |
| Ti 334.940          | 27.9                | 0.010                        | mg/L                            | 0.010                    | mg/L         | %        |
| Tl 190.801          | -2.9                | -0.063                       | mg/L                            | -0.063                   | mg/L         | %        |
| V 290.880           | -27.4               | -0.036                       | mg/L                            | -0.036                   | mg/L         | %        |
| Zn 206.200          | 14.4                | 0.004                        | mg/L                            | 0.004                    | mg/L         | %        |
| ID: Mn-GO           |                     | Seq. No.: 5                  |                                 |                          | A/S Pos:     |          |
| Sample Qty Analyte: | Corr. Intensity (g) | Prep. Volume Conc., (Calib.) | Dilution: Std. Dev. Calib Units | Conc. (Sample) Std. Dev. | Sample Units | RSD      |
| As 188.979          | -0.5                | 0.002                        | mg/L                            | 0.002                    | mg/L         | %        |
| Be 313.107          | 8.1                 | 0.028                        | mg/L                            | 0.028                    | mg/L         | %        |
| Ca 317.933          | 3263.1              | 1.312                        | mg/L                            | 1.312                    | mg/L         | %        |
| Cd 228.802          | -4.4                | -0.036                       | mg/L                            | -0.036                   | mg/L         | %        |
| Co 228.616          | 17.6                | 0.003                        | mg/L                            | 0.003                    | mg/L         | %        |
| Cr 267.716          | 63.4                | -0.006                       | mg/L                            | -0.006                   | mg/L         | %        |
| Cu 327.393          | 210.4               | 0.000                        | mg/L                            | 0.000                    | mg/L         | %        |
| Fe 238.204          | 337.7               | 0.044                        | mg/L                            | 0.044                    | mg/L         | %        |
| Li 670.784          | 7.9                 | -0.004                       | mg/L                            | -0.004                   | mg/L         | %        |
| Mg 285.213          | 4986.6              | 0.368                        | mg/L                            | 0.368                    | mg/L         | %        |
| <b>Mn 257.610</b>   | <b>833906.2</b>     | <b>30.57</b>                 | <b>mg/L</b>                     | <b>30.57</b>             | <b>mg/L</b>  | <b>%</b> |
| Mo 202.031          | 4.8                 | 0.007                        | mg/L                            | 0.007                    | mg/L         | %        |
| Ni 231.604          | 30.5                | 0.011                        | mg/L                            | 0.011                    | mg/L         | %        |
| Pb 220.353          | 2.2                 | 0.035                        | mg/L                            | 0.035                    | mg/L         | %        |
| Sb 206.836          | 1.7                 | -0.003                       | mg/L                            | -0.003                   | mg/L         | %        |
| Se 196.026          | 2.3                 | 0.009                        | mg/L                            | 0.009                    | mg/L         | %        |
| Sr 407.771          | 2947.8              | -0.016                       | mg/L                            | -0.016                   | mg/L         | %        |
| Ti 334.940          | 22.0                | 0.009                        | mg/L                            | 0.009                    | mg/L         | %        |
| Tl 190.801          | -5.1                | -0.090                       | mg/L                            | -0.090                   | mg/L         | %        |
| V 290.880           | 6.9                 | -0.029                       | mg/L                            | -0.029                   | mg/L         | %        |
| Zn 206.200          | 139.6               | 0.075                        | mg/L                            | 0.075                    | mg/L         | %        |

| ID: Fe-GO           |                     | Seq. No.: 7                  |                                 |                          | A/S Pos:     |          |
|---------------------|---------------------|------------------------------|---------------------------------|--------------------------|--------------|----------|
| Sample Qty Analyte: | Corr. Intensity (g) | Prep. Volume Conc., (Calib.) | Dilution: Std. Dev. Calib Units | Conc. (Sample) Std. Dev. | Sample Units | RSD      |
| As 188.979          | 0.3                 | 0.012                        | mg/L                            | 0.012                    | mg/L         | %        |
| Be 313.107          | -6.7                | 0.028                        | mg/L                            | 0.028                    | mg/L         | %        |
| Ca 317.933          | 8662.9              | 2.593                        | mg/L                            | 2.593                    | mg/L         | %        |
| Cd 228.802          | -12.1               | -0.038                       | mg/L                            | -0.038                   | mg/L         | %        |
| Co 228.616          | 4.9                 | -0.003                       | mg/L                            | -0.003                   | mg/L         | %        |
| Cr 267.716          | 7.7                 | -0.020                       | mg/L                            | -0.020                   | mg/L         | %        |
| Cu 327.393          | 489.1               | 0.034                        | mg/L                            | 0.034                    | mg/L         | %        |
| <b>Fe 238.204</b>   | <b>16539.7</b>      | <b>3.295</b>                 | <b>mg/L</b>                     | <b>3.295</b>             | <b>mg/L</b>  | <b>%</b> |
| Li 670.784          | -58.8               | -0.005                       | mg/L                            | -0.005                   | mg/L         | %        |
| Mg 285.213          | 9465.6              | 0.608                        | mg/L                            | 0.608                    | mg/L         | %        |
| Mn 257.610          | 3505.4              | 0.125                        | mg/L                            | 0.125                    | mg/L         | %        |
| Mo 202.031          | 2.2                 | 0.003                        | mg/L                            | 0.003                    | mg/L         | %        |
| Ni 231.604          | 160.2               | 0.116                        | mg/L                            | 0.116                    | mg/L         | %        |
| Pb 220.353          | -5.2                | 0.004                        | mg/L                            | 0.004                    | mg/L         | %        |
| Sb 206.836          | 8.9                 | 0.040                        | mg/L                            | 0.040                    | mg/L         | %        |
| Se 196.026          | 7.4                 | 0.064                        | mg/L                            | 0.064                    | mg/L         | %        |
| Sr 407.771          | 6294.7              | -0.013                       | mg/L                            | -0.013                   | mg/L         | %        |
| Ti 334.940          | 19.9                | 0.009                        | mg/L                            | 0.009                    | mg/L         | %        |
| Tl 190.801          | 4.9                 | 0.029                        | mg/L                            | 0.029                    | mg/L         | %        |
| V 290.880           | 17.2                | -0.026                       | mg/L                            | -0.026                   | mg/L         | %        |
| Zn 206.200          | 250.8               | 0.137                        | mg/L                            | 0.137                    | mg/L         | %        |

| ID: Ni-GO           |                     | Seq. No.: 8                  |                                 |                          | A/S Pos:     |          |
|---------------------|---------------------|------------------------------|---------------------------------|--------------------------|--------------|----------|
| Sample Qty Analyte: | Corr. Intensity (g) | Prep. Volume Conc., (Calib.) | Dilution: Std. Dev. Calib Units | Conc. (Sample) Std. Dev. | Sample Units | RSD      |
| As 188.979          | 4.3                 | 0.060                        | mg/L                            | 0.060                    | mg/L         | %        |
| Be 313.107          | -5.0                | 0.028                        | mg/L                            | 0.028                    | mg/L         | %        |
| Ca 317.933          | 3212.0              | 1.300                        | mg/L                            | 1.300                    | mg/L         | %        |
| Cd 228.802          | -6.4                | -0.037                       | mg/L                            | -0.037                   | mg/L         | %        |
| Co 228.616          | 5.5                 | -0.002                       | mg/L                            | -0.002                   | mg/L         | %        |
| Cr 267.716          | -13.7               | -0.025                       | mg/L                            | -0.025                   | mg/L         | %        |
| Cu 327.393          | 410.0               | 0.025                        | mg/L                            | 0.025                    | mg/L         | %        |
| Fe 238.204          | 335.4               | 0.044                        | mg/L                            | 0.044                    | mg/L         | %        |
| Li 670.784          | -14.5               | -0.005                       | mg/L                            | -0.005                   | mg/L         | %        |
| Mg 285.213          | 5453.3              | 0.393                        | mg/L                            | 0.393                    | mg/L         | %        |
| Mn 257.610          | 21567.1             | 0.787                        | mg/L                            | 0.787                    | mg/L         | %        |
| Mo 202.031          | -7.8                | -0.012                       | mg/L                            | -0.012                   | mg/L         | %        |
| <b>Ni 231.604</b>   | <b>34206.2</b>      | <b>27.53</b>                 | <b>mg/L</b>                     | <b>27.53</b>             | <b>mg/L</b>  | <b>%</b> |
| Pb 220.353          | 9.3                 | 0.064                        | mg/L                            | 0.064                    | mg/L         | %        |
| Sb 206.836          | -1.7                | -0.023                       | mg/L                            | -0.023                   | mg/L         | %        |
| Se 196.026          | 2.7                 | 0.014                        | mg/L                            | 0.014                    | mg/L         | %        |
| Sr 407.771          | 1712.4              | -0.016                       | mg/L                            | -0.016                   | mg/L         | %        |
| Ti 334.940          | 18.7                | 0.009                        | mg/L                            | 0.009                    | mg/L         | %        |
| Tl 190.801          | 0.4                 | -0.024                       | mg/L                            | -0.024                   | mg/L         | %        |
| V 290.880           | 10.1                | -0.028                       | mg/L                            | -0.028                   | mg/L         | %        |
| Zn 206.200          | 170.9               | 0.092                        | mg/L                            | 0.092                    | mg/L         | %        |
